# Supplementary material
Source: MDPI journal article supplement (https://www.mdpi.com/2624-8549/6/3/23)
Supplement: s1 [file s1]

# Reaction of $\beta$ -Nitrostyrene with Diethyl Malonate in the Presence of Bispidines: The Unusual Role of the Organocatalyst

Alexander I. Dalinger <sup>1</sup>, Sabina F. Mamedova <sup>2</sup>, Julia V. Burykina <sup>1</sup>, Evgeniy O. Pentsak <sup>1</sup> and Sergey Z. Vatsadze <sup>1\*</sup>

<sup>1</sup> N.D. Zelinsky Institute of Organic Chemistry, Russian Academy of Sciences, Leninsky Prospect 47, Moscow 119991, Russia; [dal1995@mail.ru](mailto:dal1995@mail.ru) (A.I.D.), [ivanova@ioc.ac.ru](mailto:ivanova@ioc.ac.ru) (J.V.B), [p\\_eugene@ioc.ac.ru](mailto:p_eugene@ioc.ac.ru) (E.O.P.), [zurabych@gmail.com](mailto:zurabych@gmail.com) (S.Z.V.)

<sup>2</sup> Department of Chemistry, Lomonosov Moscow State University, Leninskie Gory, MSU, 1-3, 119991 Moscow, Russia; [sem.ms9696@gmail.com](mailto:sem.ms9696@gmail.com) (S.F.M.)

\* Correspondence: [zurabych@gmail.com](mailto:zurabych@gmail.com)

## Supplementary Information

### Contents

|                                   |    |
|-----------------------------------|----|
| Table S1.....                     | 3  |
| Photos of reaction mixtures ..... | 4  |
| Figure S1 .....                   | 4  |
| NMR spectra.....                  | 5  |
| Figure S2 .....                   | 5  |
| Figure S3 .....                   | 5  |
| Figure S4 .....                   | 6  |
| Figure S6 .....                   | 7  |
| Figure S7 .....                   | 7  |
| Figure S8 .....                   | 8  |
| Figure S9 .....                   | 8  |
| Figure S10 .....                  | 9  |
| Figure S11 .....                  | 9  |
| Figure S12 .....                  | 10 |
| Figure S13 .....                  | 10 |
| Figure S14 .....                  | 11 |
| Figure S15 .....                  | 11 |
| Figure S16 .....                  | 12 |
| Figure S17 .....                  | 12 |

|                                                                                                            |    |
|------------------------------------------------------------------------------------------------------------|----|
| Scheme S1 .....                                                                                            | 13 |
| Figure S18 .....                                                                                           | 13 |
| Figure S19 .....                                                                                           | 14 |
| Figure S21 .....                                                                                           | 15 |
| Figure S22 .....                                                                                           | 16 |
| HRMS spectra .....                                                                                         | 16 |
| Experimental .....                                                                                         | 16 |
| Figure S23 .....                                                                                           | 17 |
| Figure S24 .....                                                                                           | 18 |
| Figure S25 .....                                                                                           | 18 |
| Figure S26 .....                                                                                           | 19 |
| Figure S27 .....                                                                                           | 19 |
| Figure S28 .....                                                                                           | 20 |
| Figure S29 .....                                                                                           | 20 |
| Figure S31 .....                                                                                           | 22 |
| IR spectra .....                                                                                           | 22 |
| Figure S32 .....                                                                                           | 23 |
| Figure S33 .....                                                                                           | 23 |
| Figure S34 .....                                                                                           | 24 |
| Figure S35 .....                                                                                           | 24 |
| TGA/DSC-analysis.....                                                                                      | 24 |
| Figure S36 .....                                                                                           | 25 |
| SEM-EDX study .....                                                                                        | 25 |
| Figure S37 .....                                                                                           | 25 |
| The addition of diethyl malonate to $\beta$ -nitrostyrene in the presence of catalytic amounts of NaH..... | 26 |
| Figure S38 .....                                                                                           | 27 |
| References.....                                                                                            | 27 |

**Table S1**

**Table S1.** The results of the catalytic reaction<sup>1</sup> in solvents of various nature.

| Solvent                       | Conversion of<br>nitrostyrene 3, % <sup>2,3</sup> | Formation of product 5 <sup>2,3</sup> | Side<br>processes <sup>2</sup> |
|-------------------------------|---------------------------------------------------|---------------------------------------|--------------------------------|
| Toluene                       | 100                                               | Yes (98% <sup>4</sup> )               | No                             |
| 1,4-Dioxane                   | 100                                               | Yes (96% <sup>4</sup> )               | No                             |
| THF                           | 100                                               | Yes (89% <sup>4</sup> )               | Yes                            |
| DCM                           | 100                                               | Yes                                   | Yes                            |
| CHCl <sub>3</sub>             | 100                                               | Yes                                   | Yes                            |
| MeCN                          | 100                                               | Yes                                   | Yes                            |
| EtOH                          | 100                                               | Yes                                   | Yes                            |
| <i>n</i> -Hexane <sup>5</sup> | n/a                                               | No                                    | n/a                            |
| H <sub>2</sub> O <sup>5</sup> | n/a                                               | No                                    | n/a                            |

<sup>1</sup> Catalytic reactions were carried out in the presence of 1 eq.  $\beta$ -nitrostyrene, 5 eq. diethyl malonate and 0.2 eq. *N*-benzylbispidine in 2 mL of corresponding solvent at room temperature for 24 hours.

<sup>2</sup>Determined by <sup>1</sup>H NMR of the reaction mixture.

<sup>3</sup>Determined by TLC analysis of the reaction mixture.

<sup>4</sup>The product was isolated by column chromatography.

<sup>5</sup> The reaction components were not soluble in these solvents.

## Photos of reaction mixtures

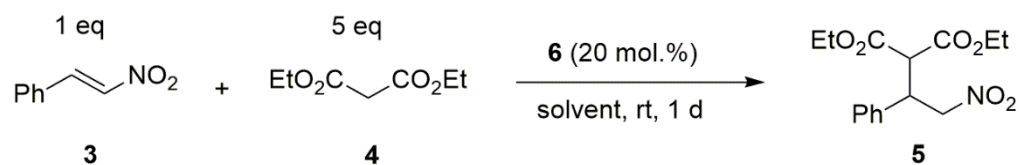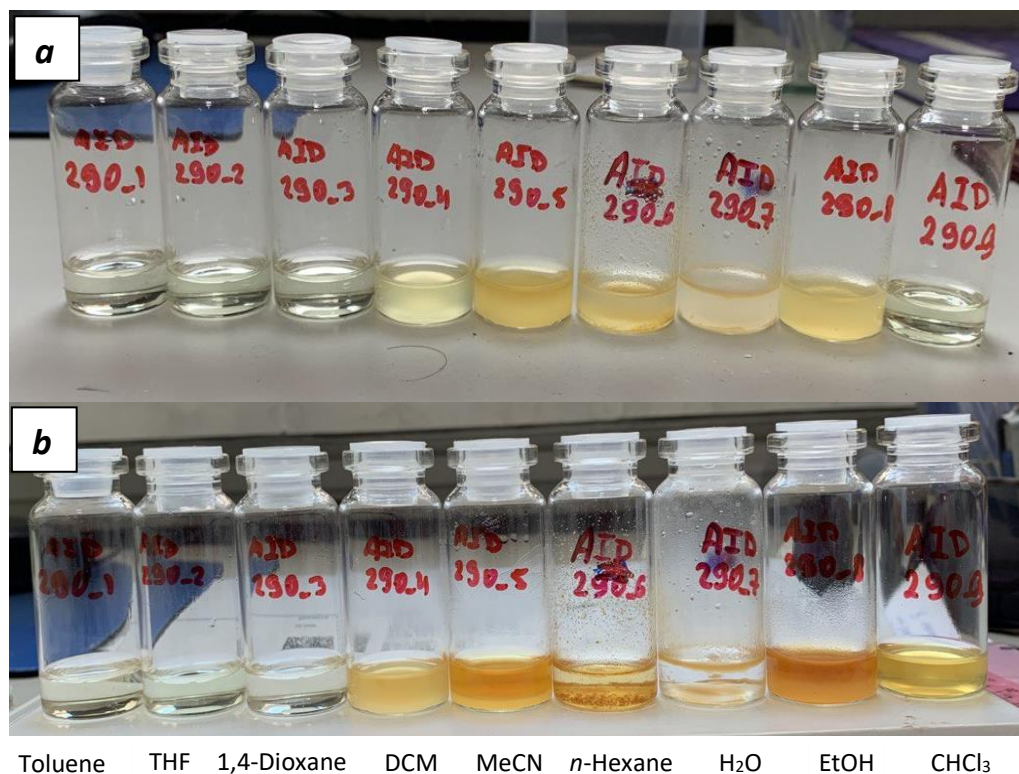

**Figure S1.** The reaction mixtures after the indicated time after mixing the reagents: (a) toluene – 1 h 15 min, THF – 1 h 10 min, 1,4-dioxane – 1 h, DCM – 50 min, MeCN – 45 min, *n*-hexane – 40 min, H<sub>2</sub>O – 35 min, EtOH – 25 min, CHCl<sub>3</sub> – 10 min; (b) after 24 h.

## NMR spectra

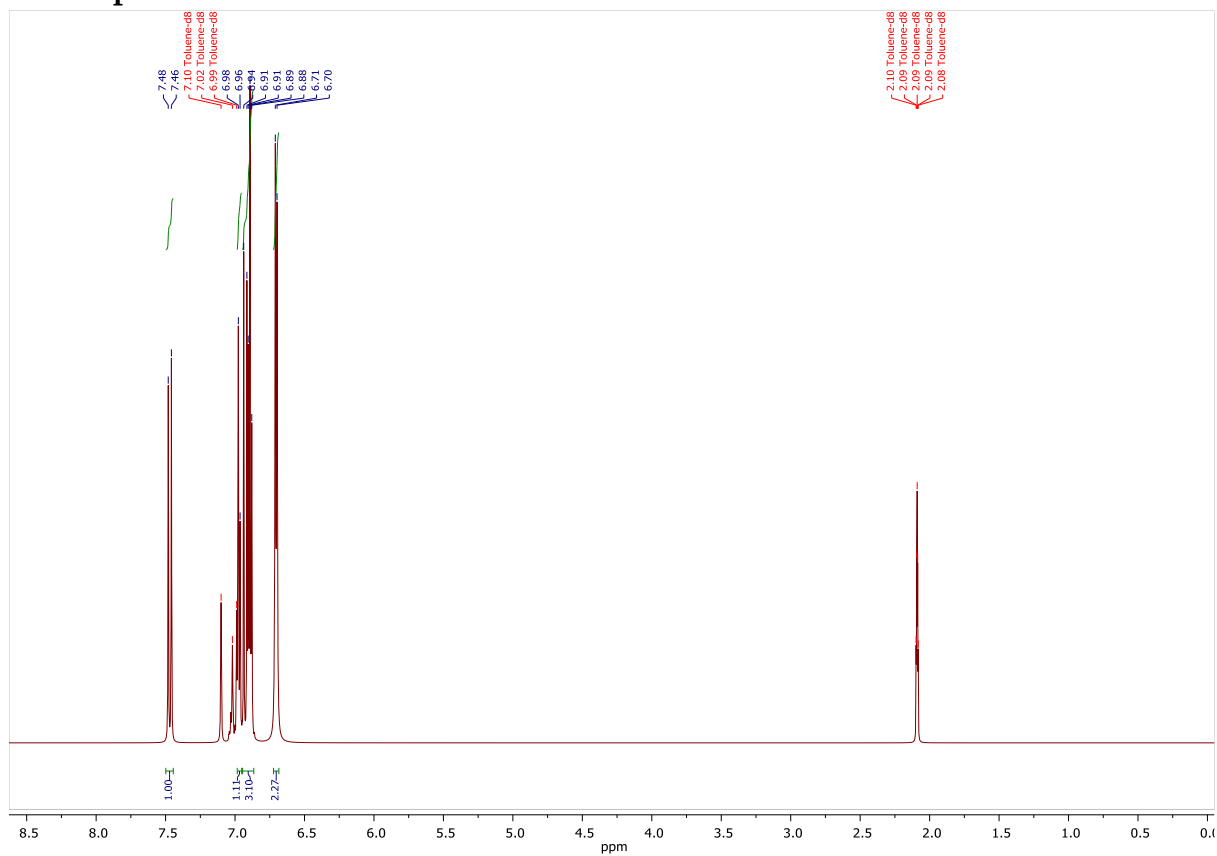

**Figure S2.** <sup>1</sup>H NMR spectrum of nitrostyrene **3** (600 MHz, toluene-d<sub>8</sub>).

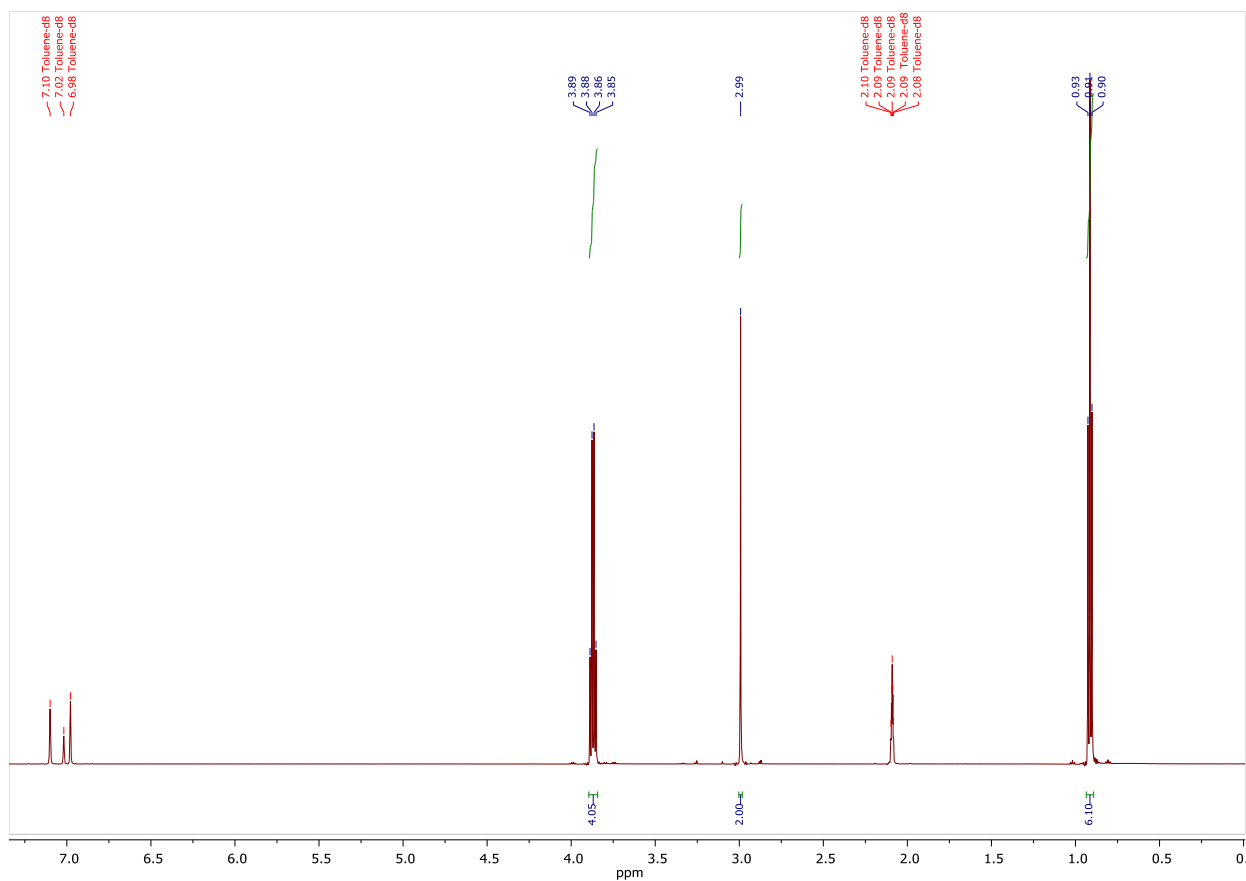

**Figure S3.** <sup>1</sup>H NMR spectrum of diethyl malonate **4** (600 MHz, toluene-d<sub>8</sub>).

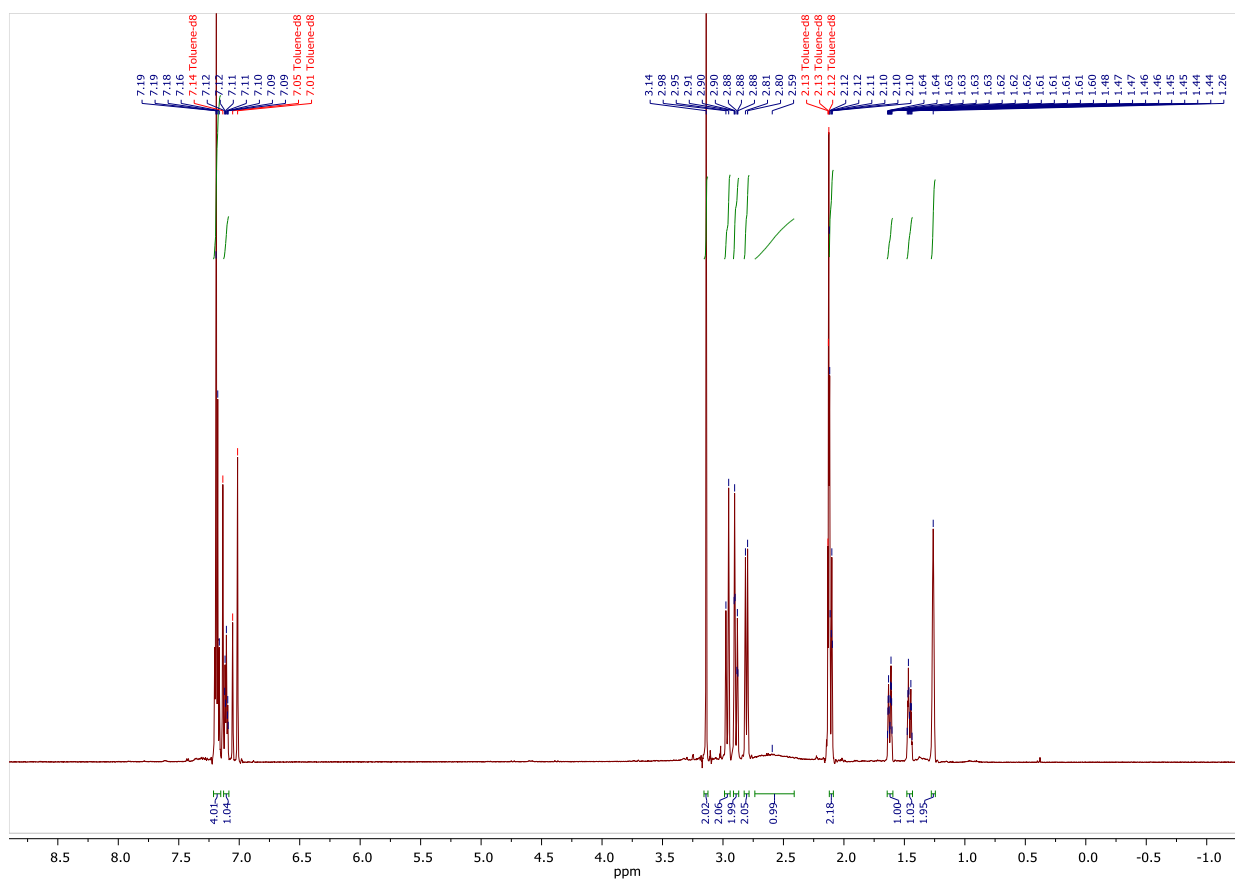

**Figure S4.** <sup>1</sup>H NMR spectrum of N-benzylbispidine **6** (600 MHz, toluene-d<sub>8</sub>).

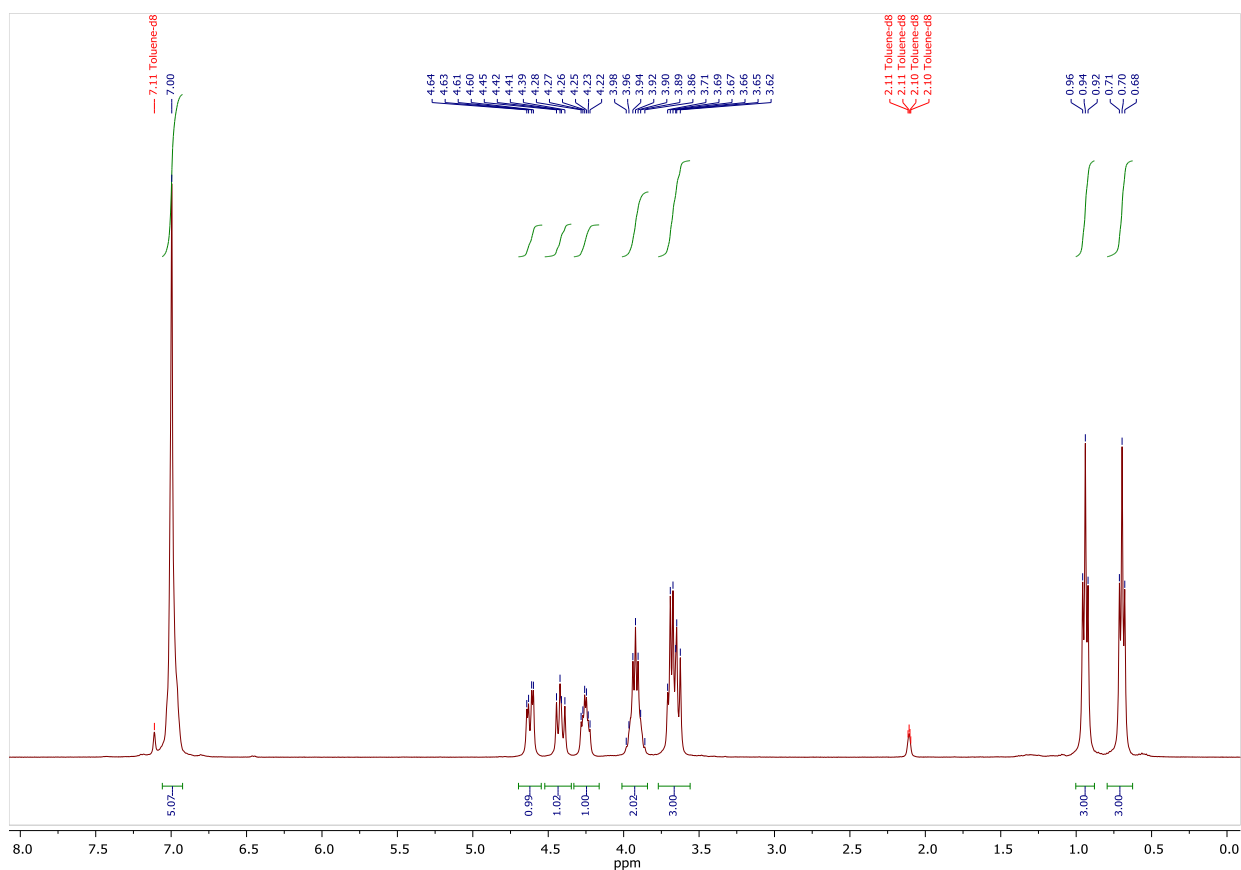

**Figure S5.** <sup>1</sup>H NMR spectrum of the addition product **5** (400 MHz, toluene-d<sub>8</sub>).

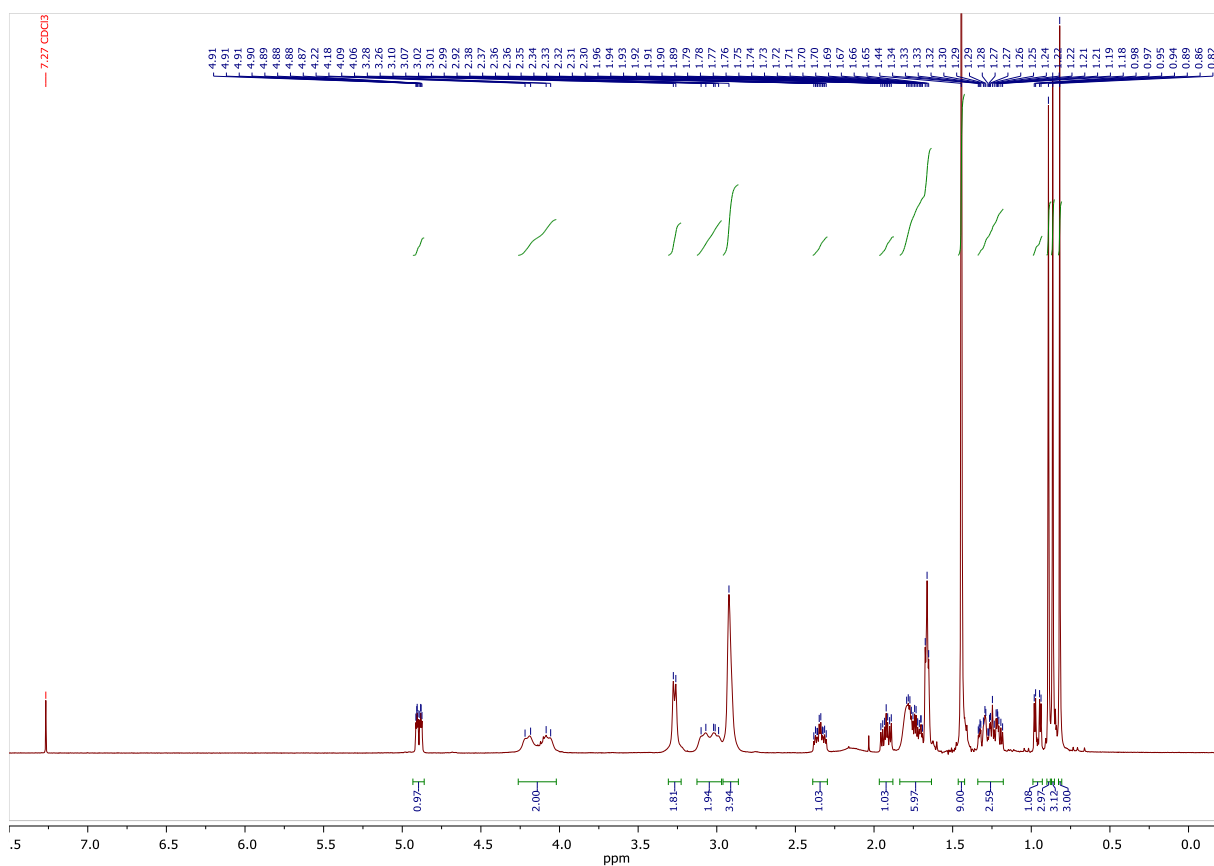

**Figure S6.** <sup>1</sup>H NMR spectrum of the compound **9a** (400 MHz, CDCl<sub>3</sub>).

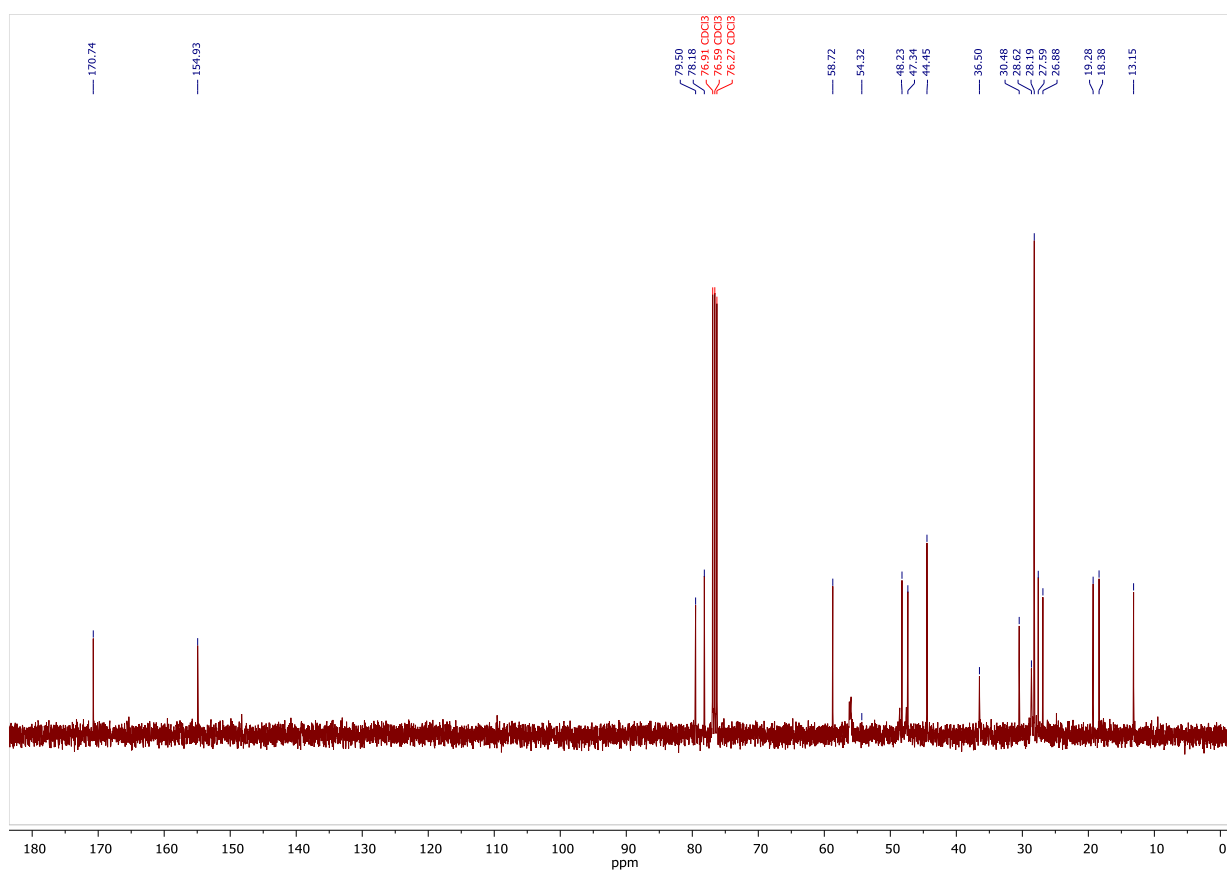

**Figure S7.** <sup>13</sup>C NMR spectrum of the compound **9a** (101 MHz, CDCl<sub>3</sub>).

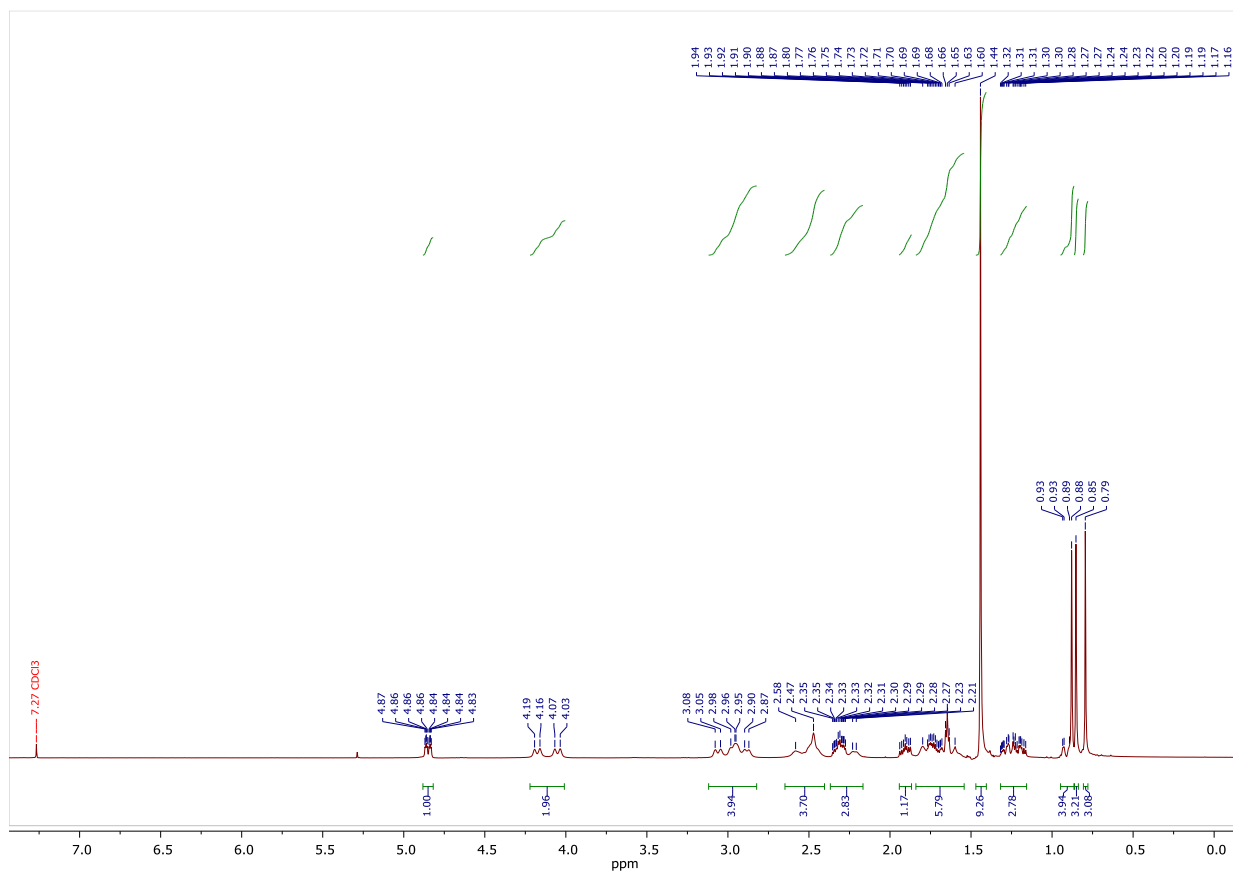

Figure S8. <sup>1</sup>H NMR spectrum of the compound **9b** (400 MHz, CDCl<sub>3</sub>).

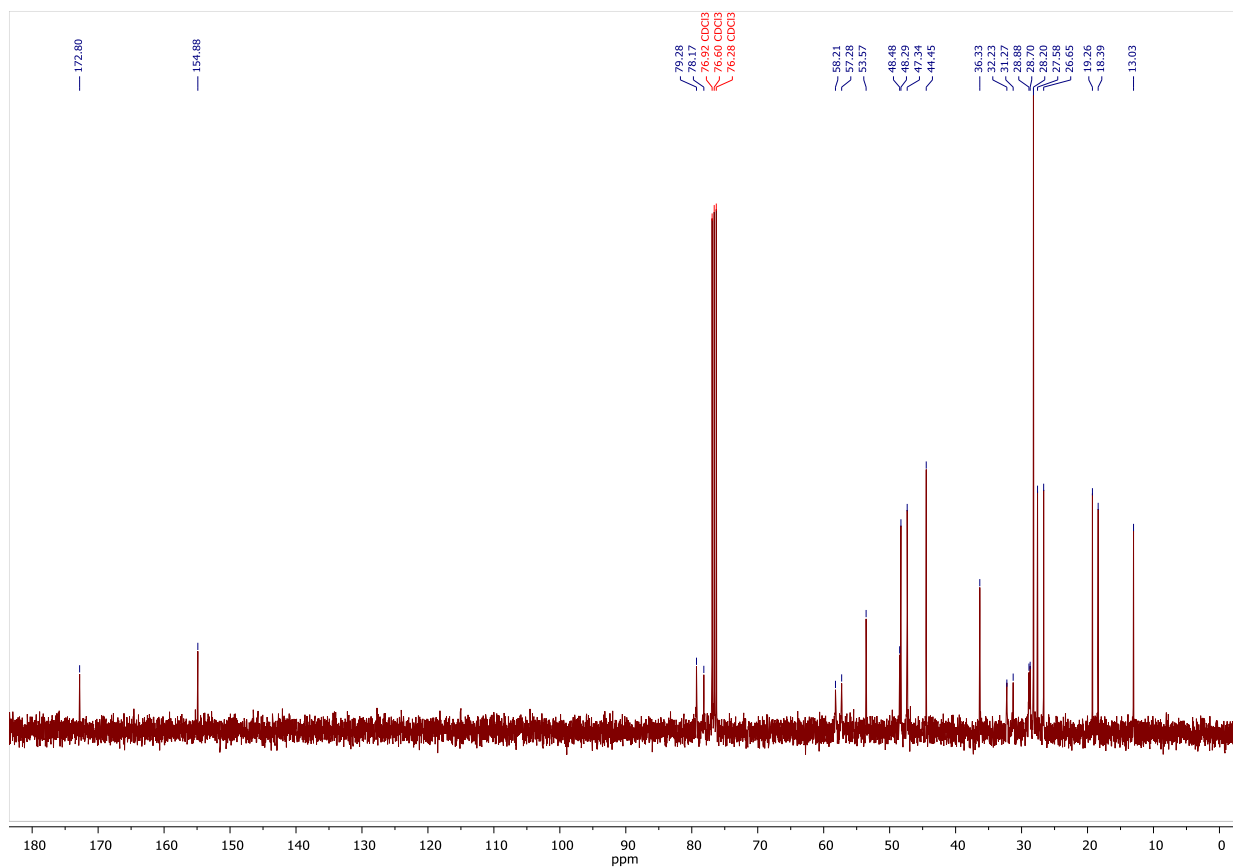

Figure S9. <sup>13</sup>C NMR spectrum of the compound **9b** (101 MHz, CDCl<sub>3</sub>).



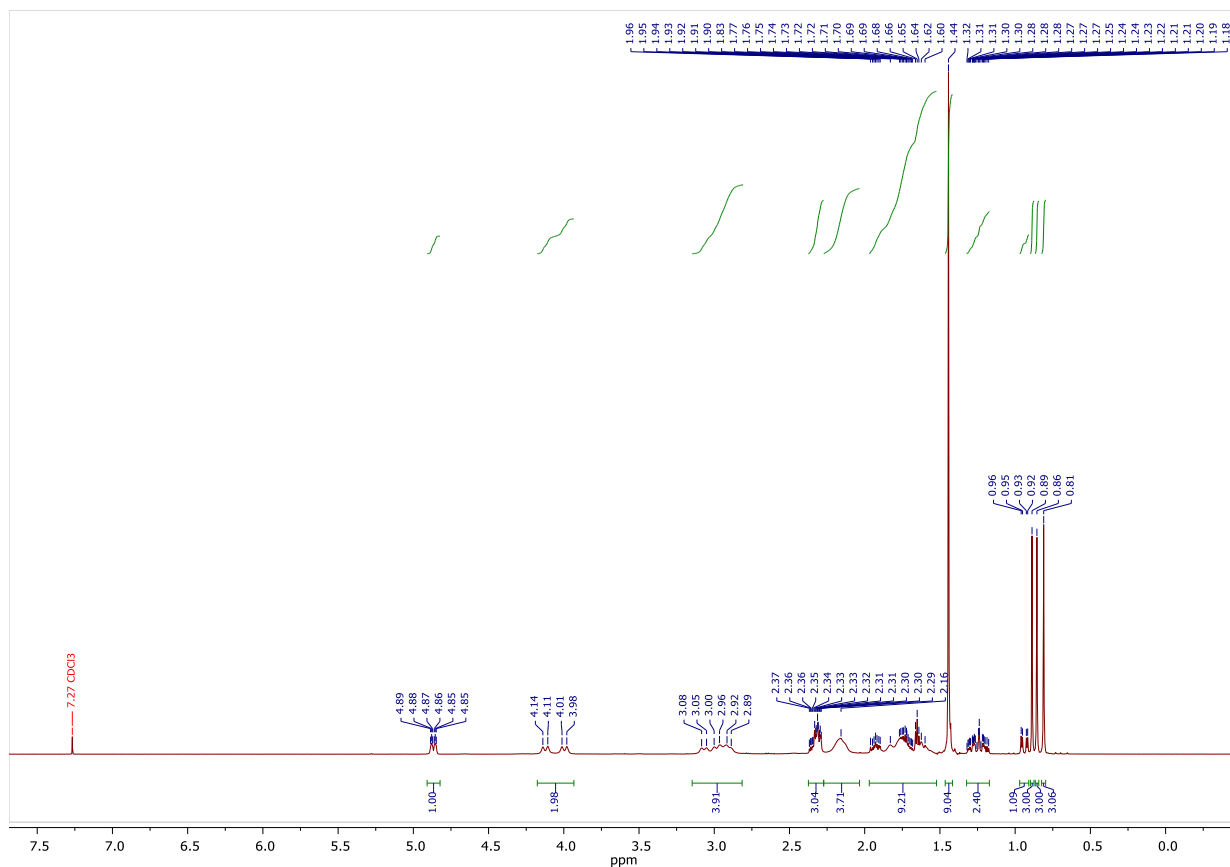

**Figure S10.** <sup>1</sup>H NMR spectrum of the compound **9c** (400 MHz, CDCl<sub>3</sub>).

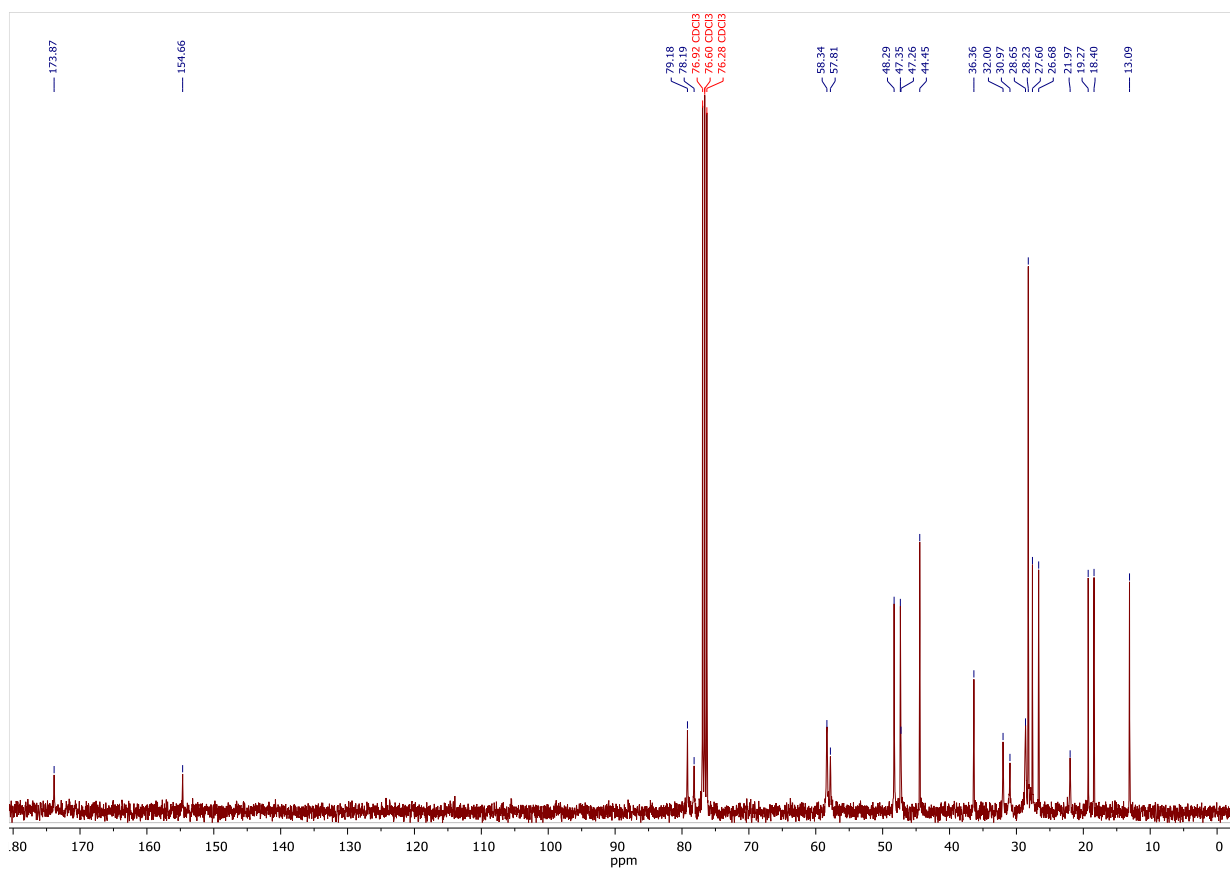

**Figure S11.** <sup>13</sup>C NMR spectrum of the compound **9c** (101 MHz, CDCl<sub>3</sub>).

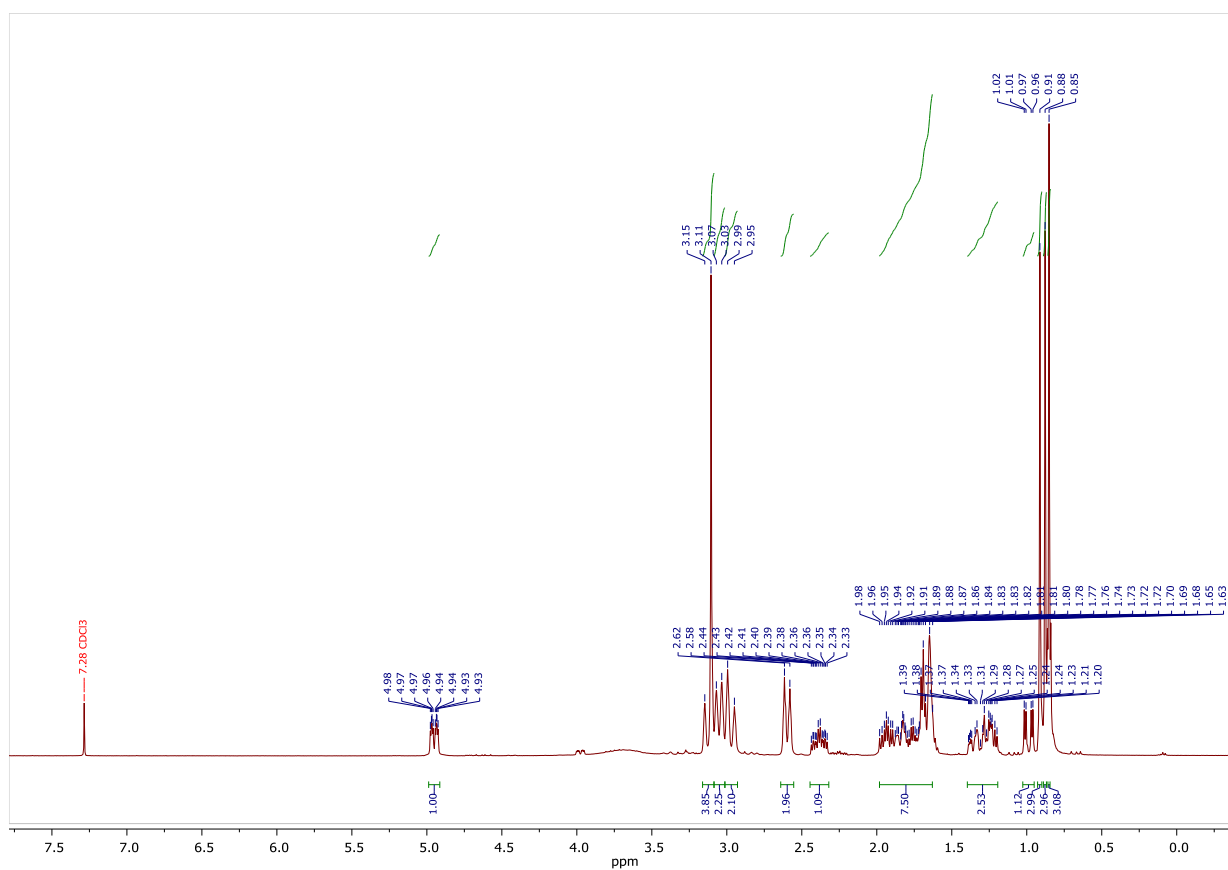

**Figure S12.** <sup>1</sup>H NMR spectrum of the compound 10a (300 MHz, CDCl<sub>3</sub>).

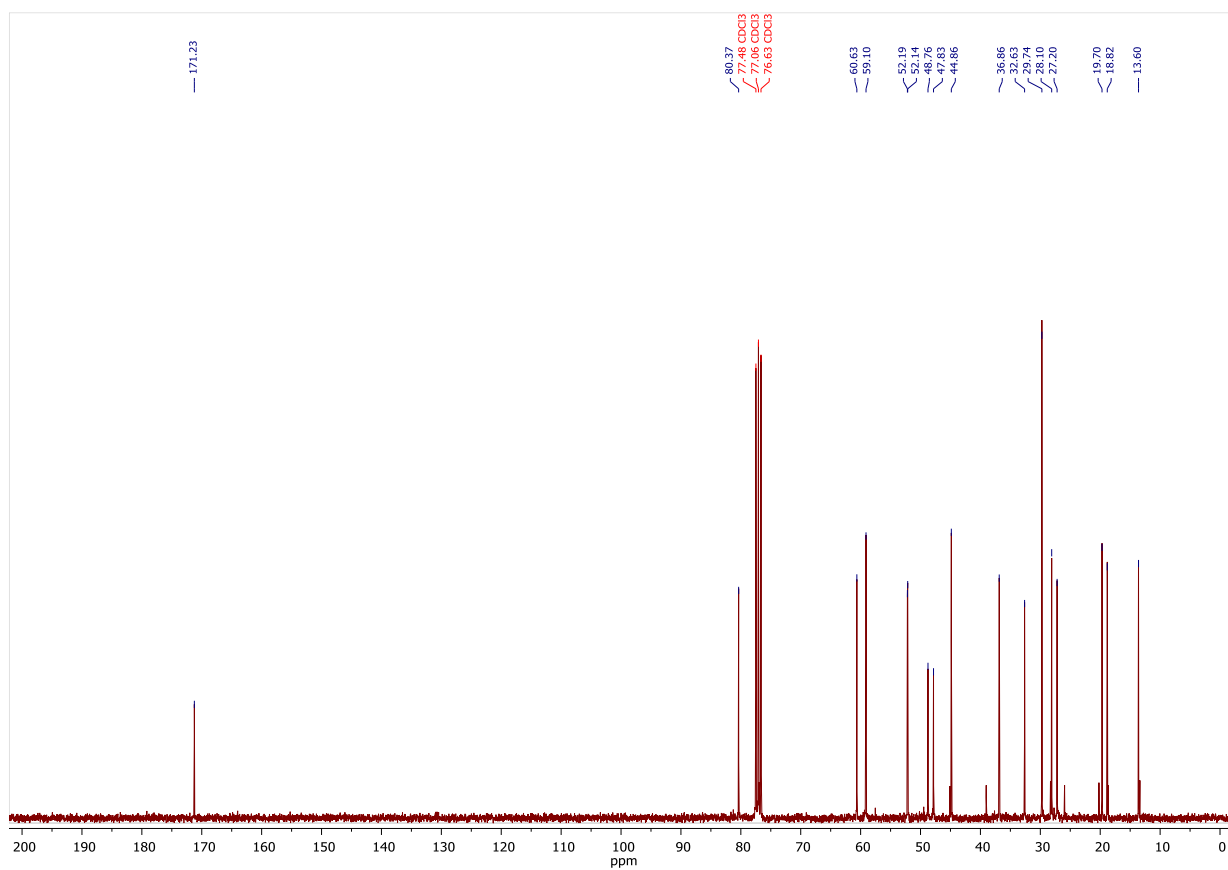

**Figure S13.** <sup>13</sup>C NMR spectrum of the compound 10a (76 MHz, CDCl<sub>3</sub>).

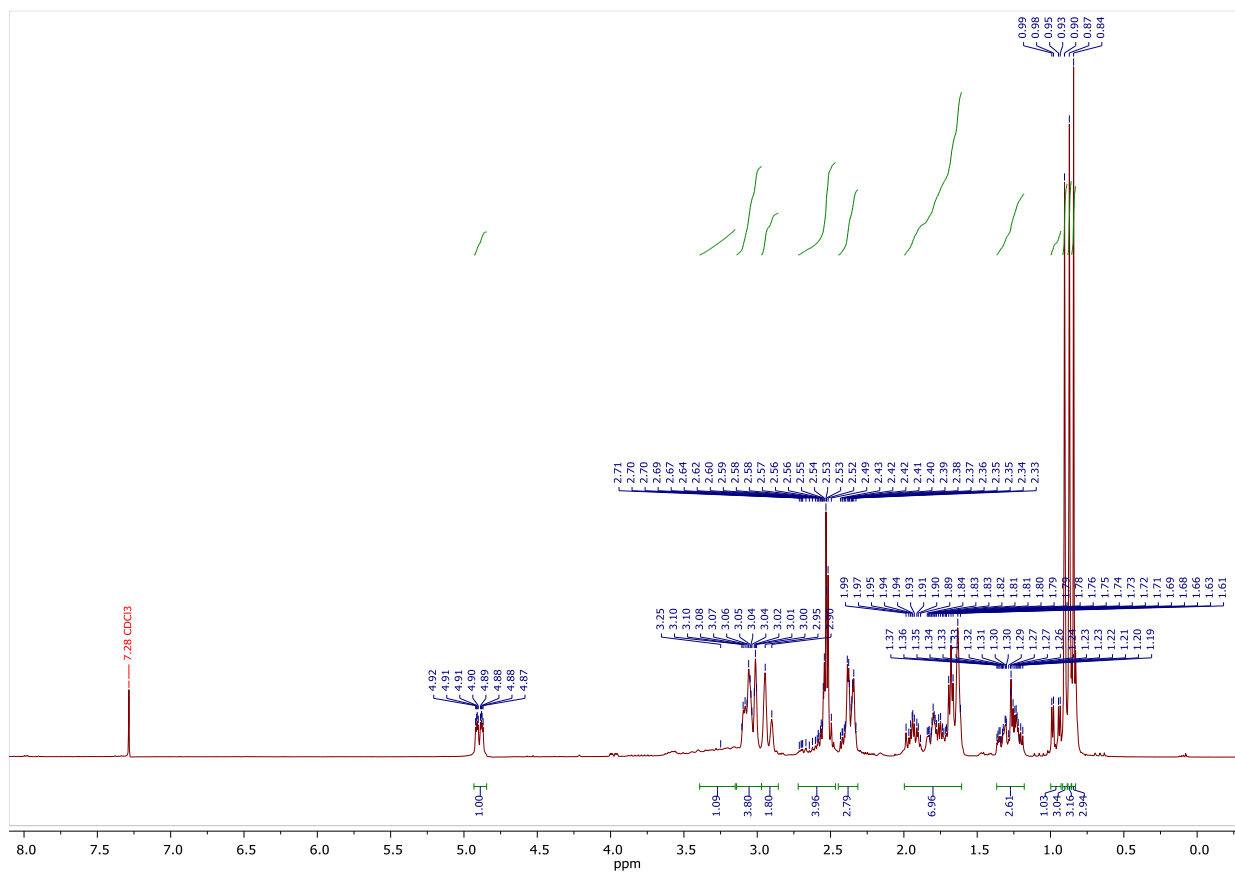

Figure S14. <sup>1</sup>H NMR spectrum of the compound **10b** (300 MHz, CDCl<sub>3</sub>).

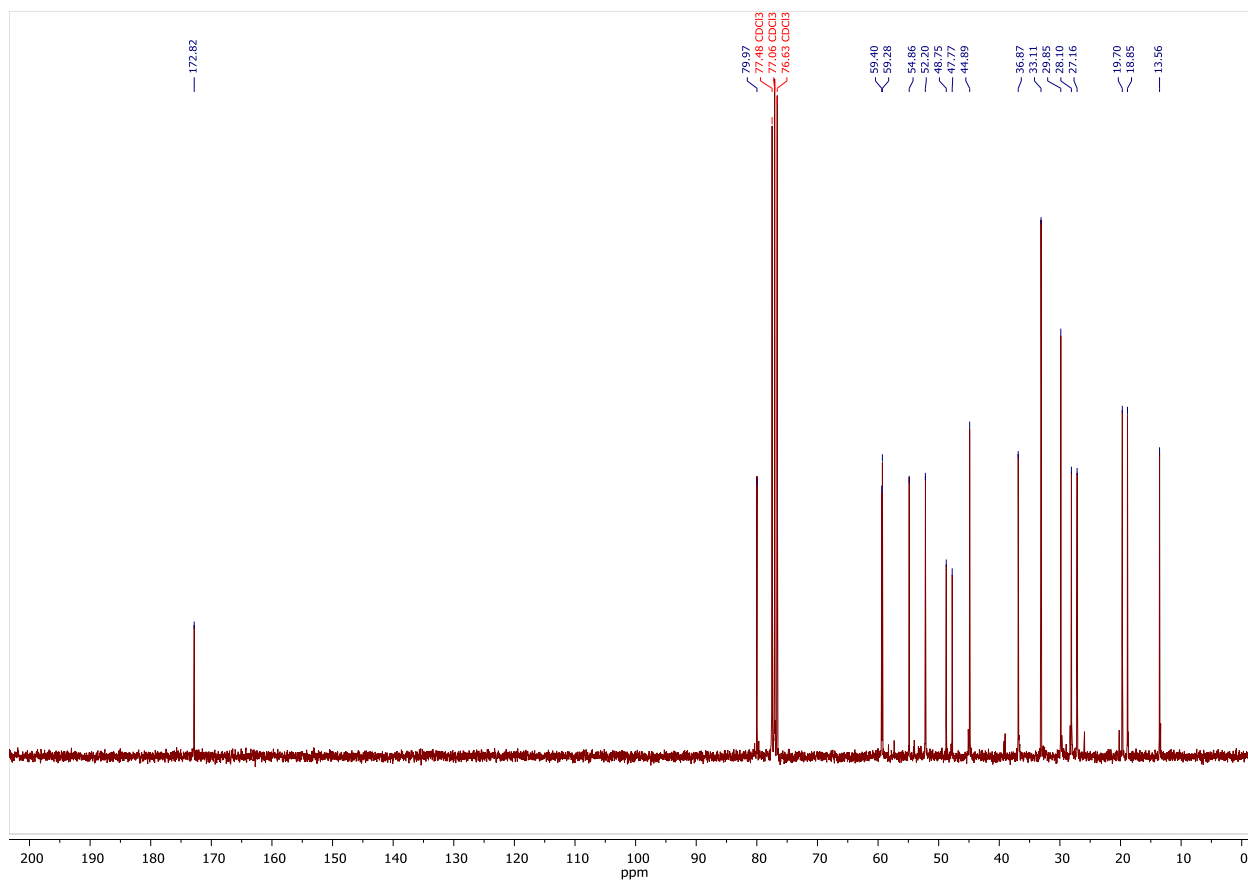

Figure S15. <sup>13</sup>C NMR spectrum of the compound **10b** (76 MHz, CDCl<sub>3</sub>).

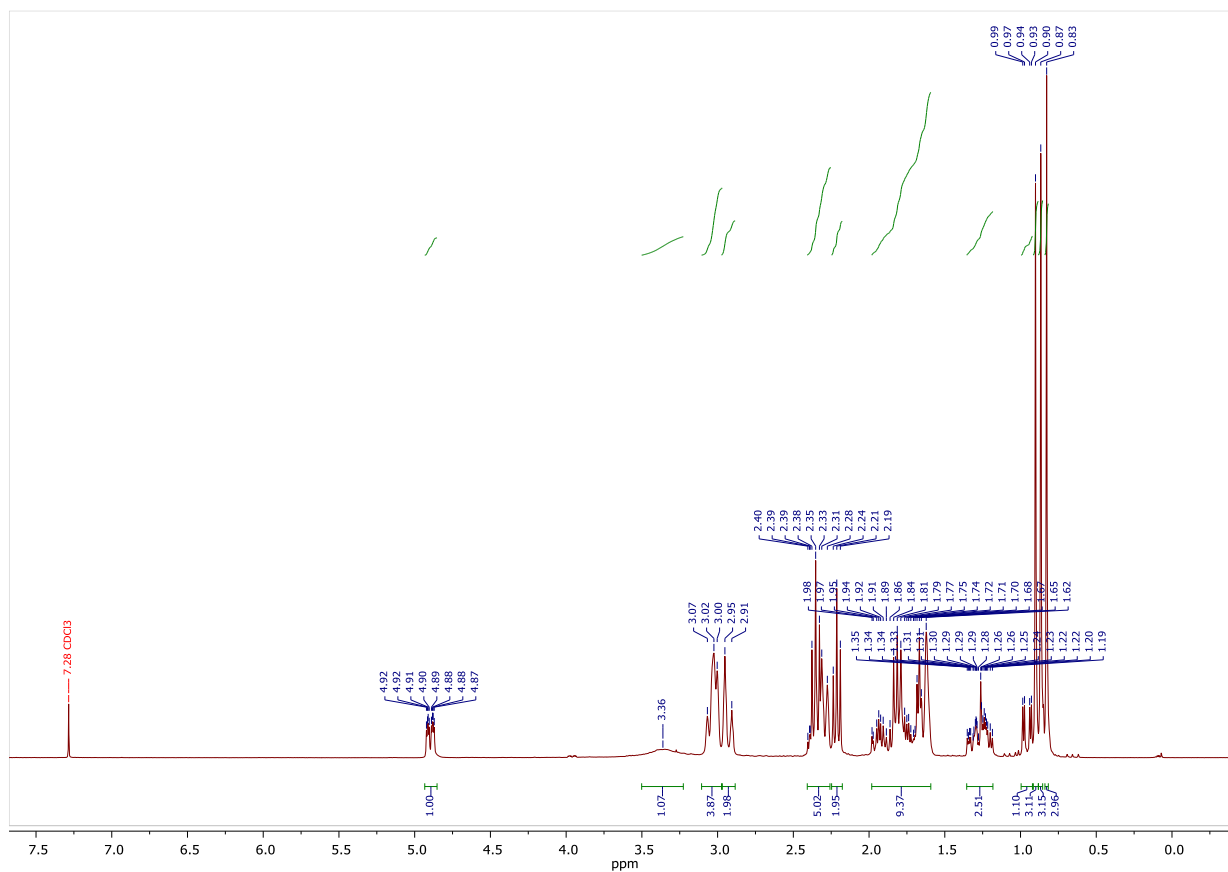

**Figure S16.** <sup>1</sup>H NMR spectrum of the compound **10c** (300 MHz, CDCl<sub>3</sub>).

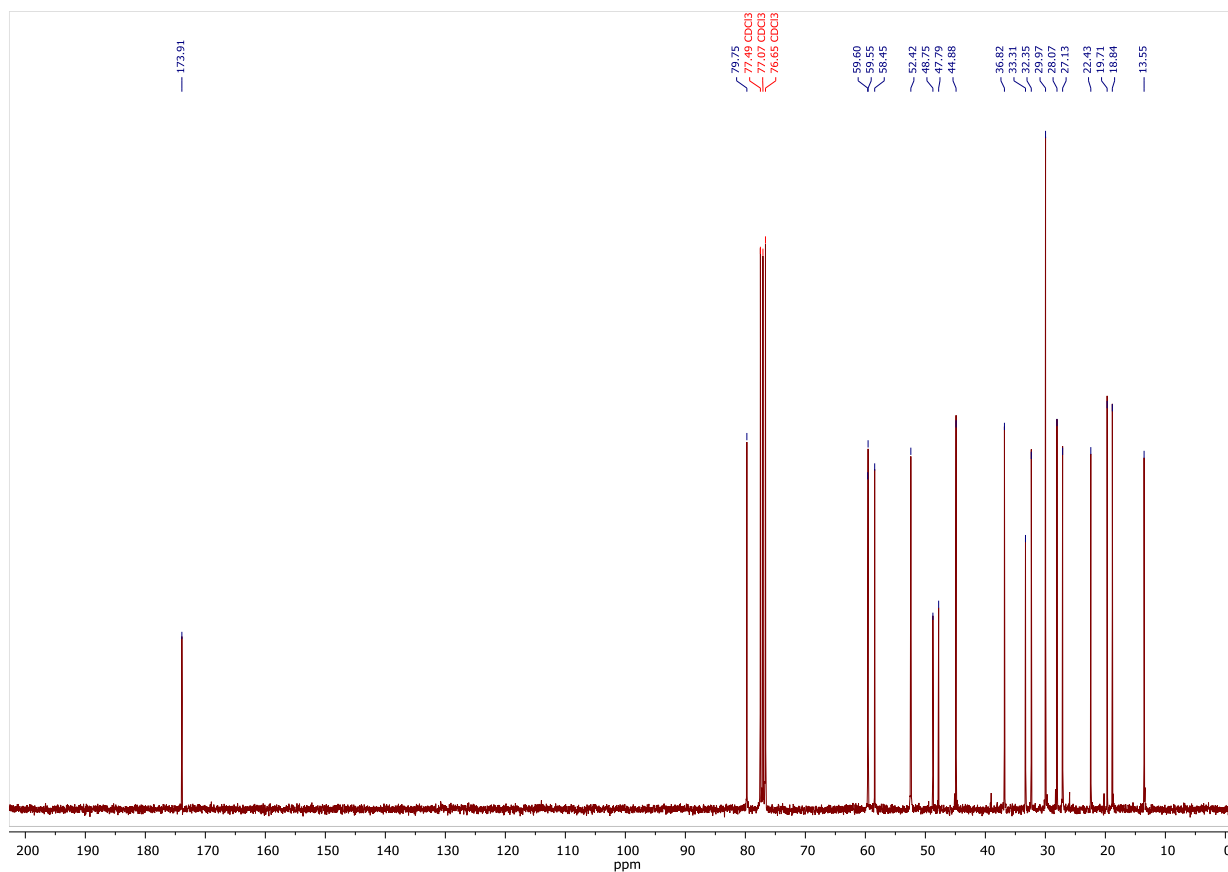

**Figure S17.** <sup>13</sup>C NMR spectrum of the compound **10c** (76 MHz, CDCl<sub>3</sub>).

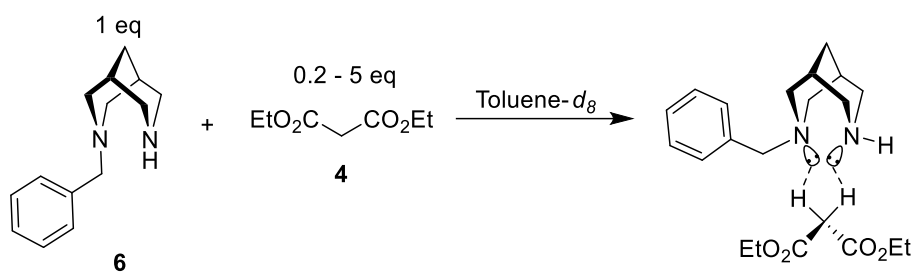

**Scheme S1.** Proposed formation of a supramolecular complex between *N*-benzylbispidine **6** and diethyl malonate (**4**).

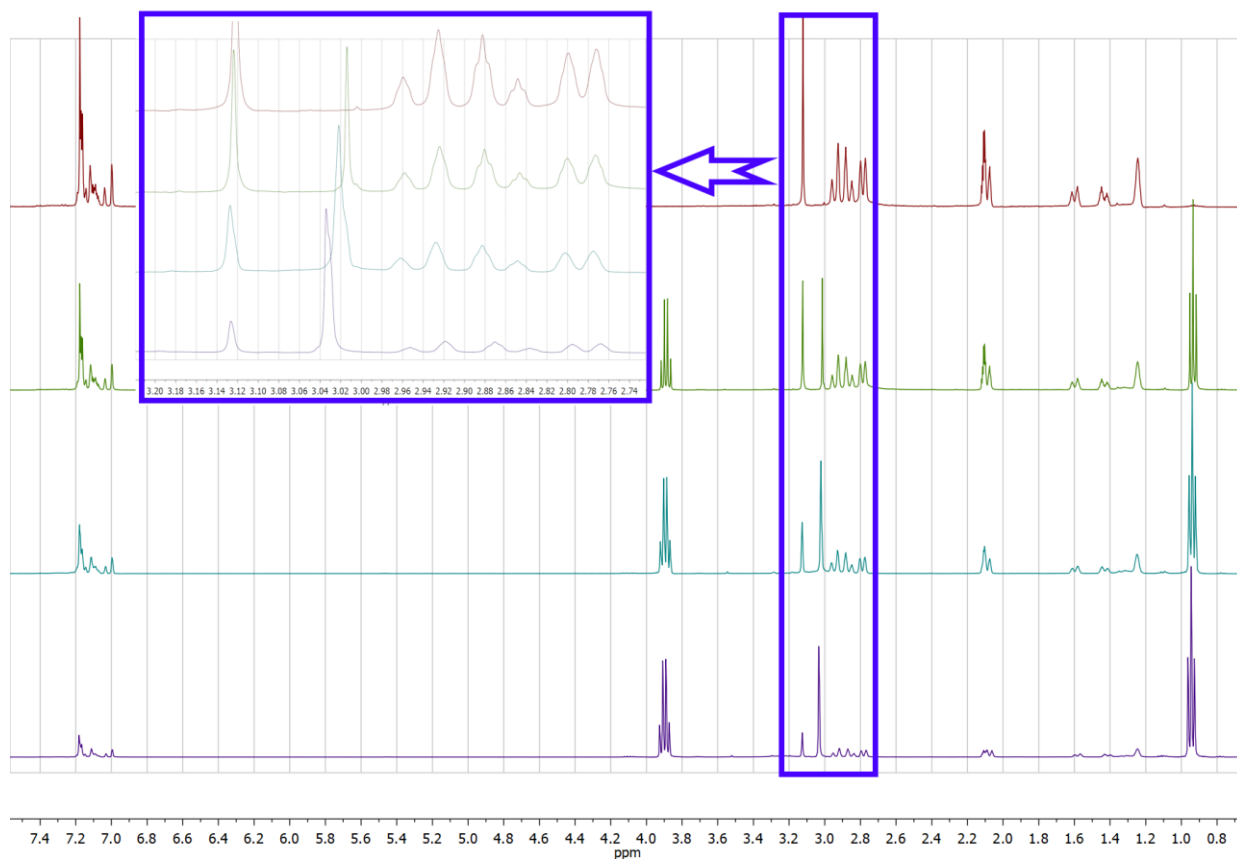

**Figure S18.** <sup>1</sup>H NMR spectra (400 MHz, toluene-*d*<sub>8</sub>) of the binary mixtures of bispidine **6** and diethyl malonate in ratios: 1:0; 1:1; 1:3 and 1:5 (top to bottom).

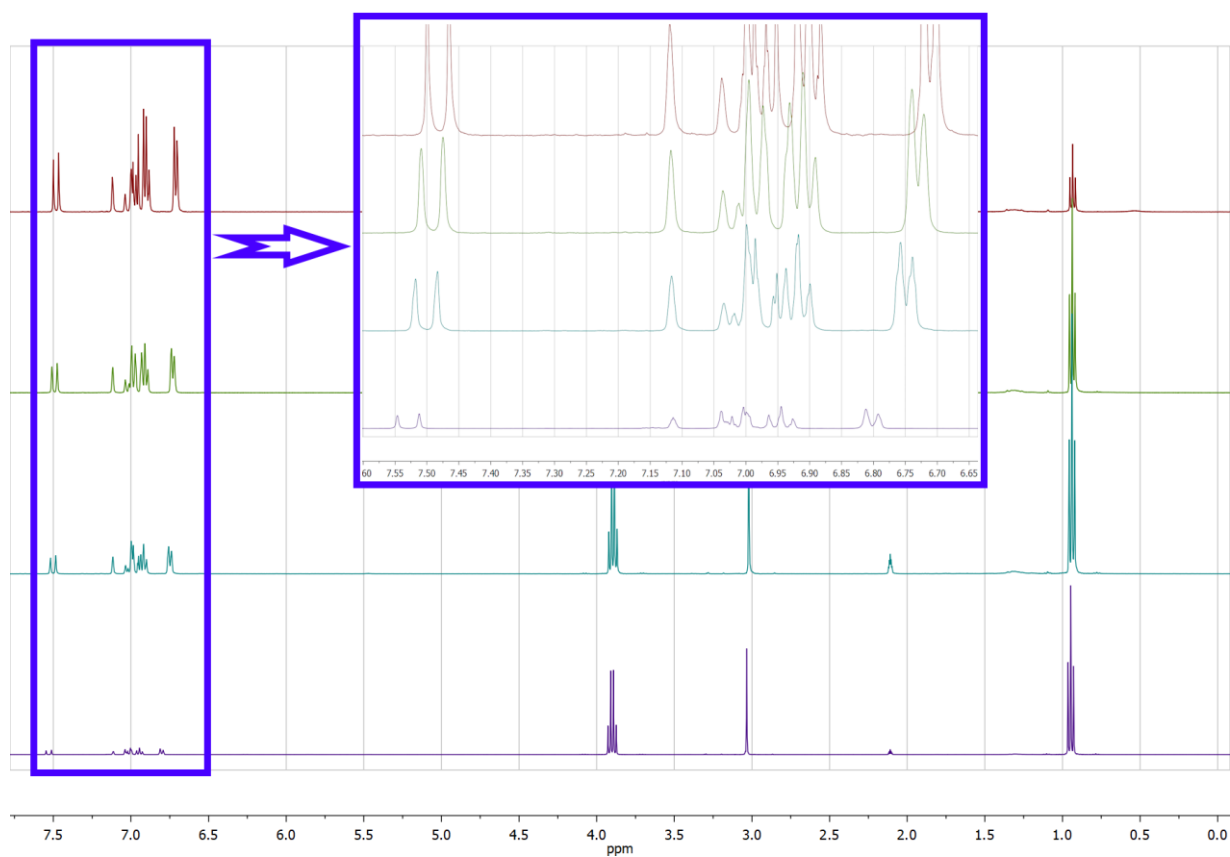

**Figure S19.**  $^1\text{H}$  NMR spectra (400 MHz, toluene- $d_8$ ) of the binary mixtures of  $\beta$ -nitrostyrene and diethyl malonate in ratios: 1:0.2, 1:1, 1:2, 1:5 (top to bottom).

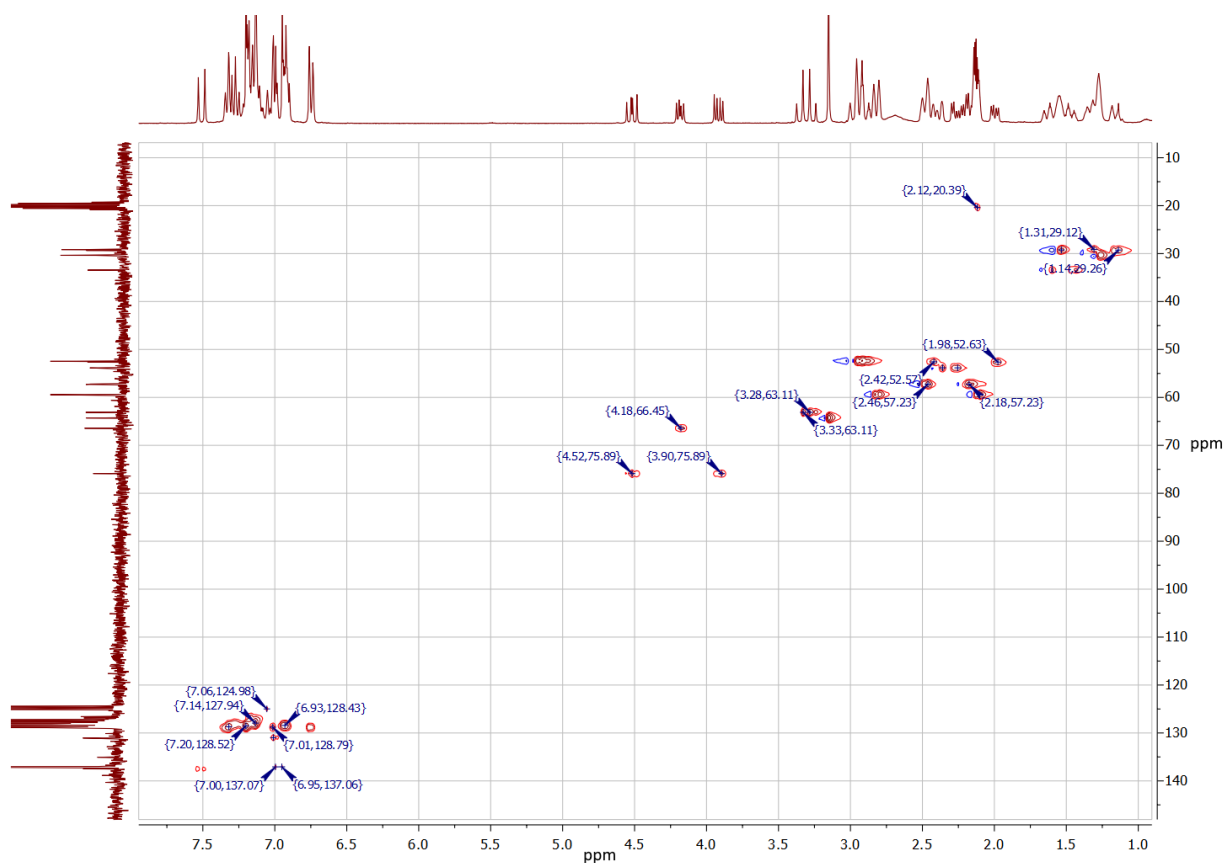

**Figure S20.** 2D NMR  $^1\text{H}$ - $^{13}\text{C}$  HSQC (toluene- $d_8$ ) spectrum of the binary mixture of  $\beta$ -nitrostyrene and bispidine **6** (1:1). Only the cross-peaks associated with the new reaction product are marked. The cross-peaks within the aromatic region are related to the phenyl groups of all three of the components in the mixture, although no clear correlation can be made.

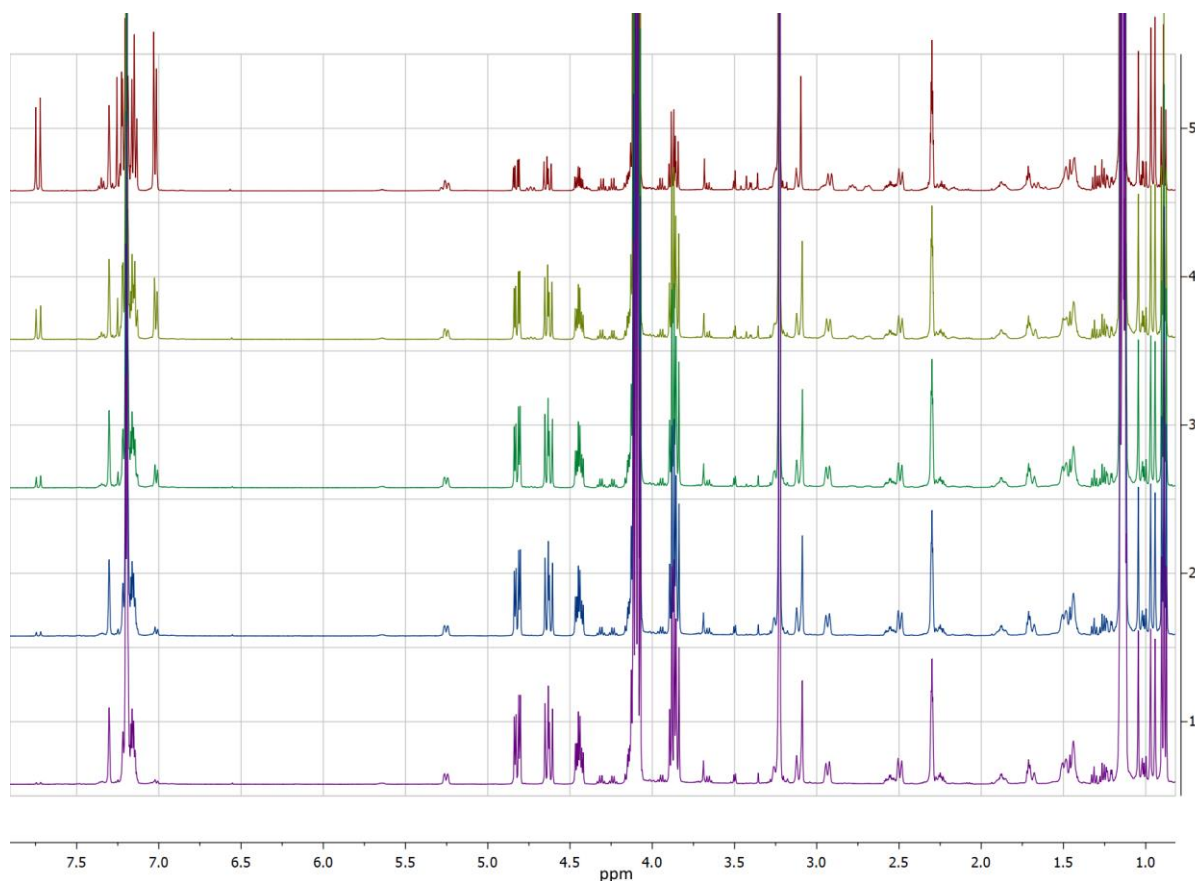

**Figure S21.**  $^1\text{H}$  NMR spectra (600 MHz, toluene- $d_8$ ) of the catalytic reaction using bispidine **10a** as a catalyst at 0, 60, 120, 180 and 240 min after the start of the reaction (top to bottom).

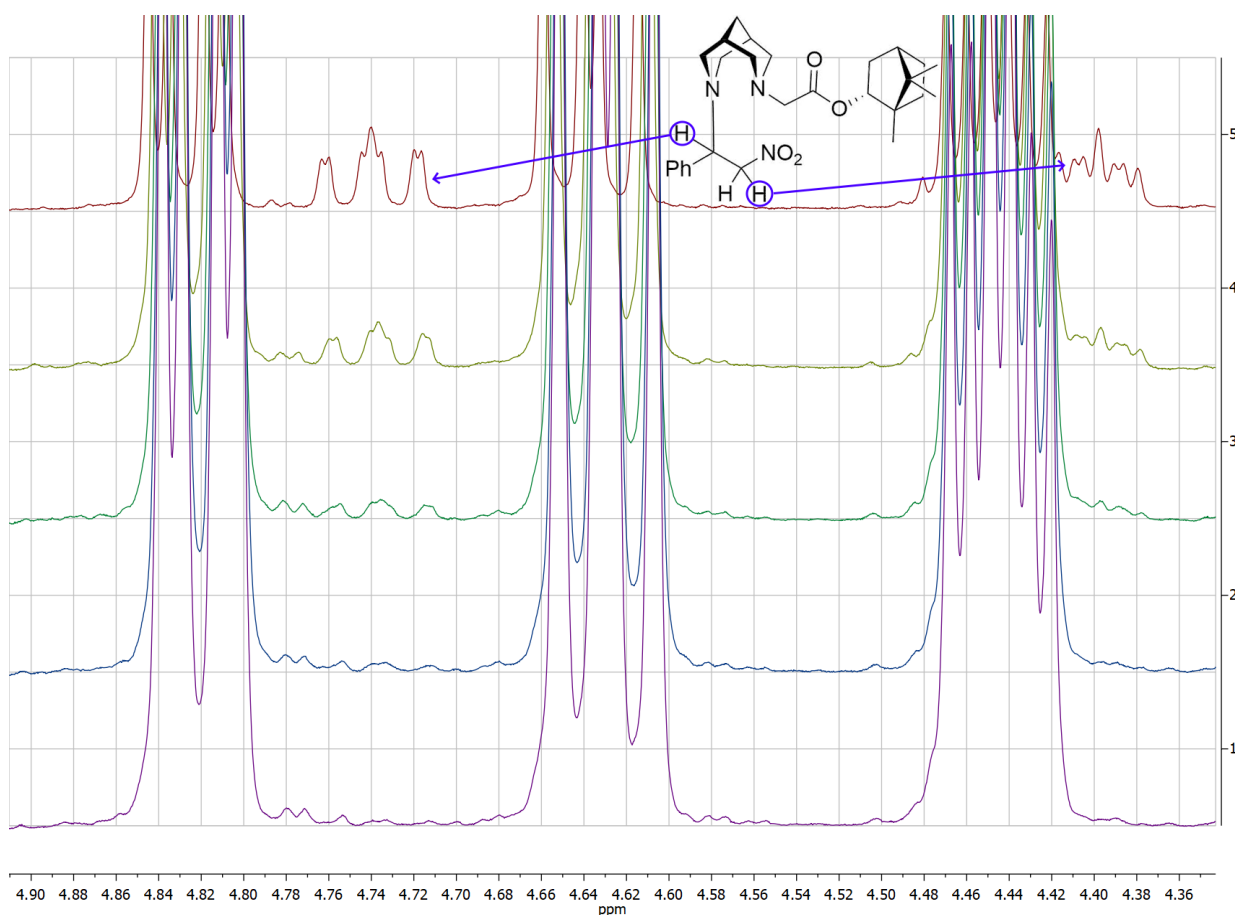

**Figure S22.**  $^1\text{H}$  NMR spectra (600 MHz, toluene- $d_8$ ) of the catalytic reaction using bispidine **10a** as a catalyst at 0, 60, 120, 180 and 240 min after the start of the reaction in the region of 4.34 – 4.92 ppm (top to bottom)

## HRMS spectra

### Experimental

High-resolution mass spectra (HRMS) were obtained on Bruker maXis Q-TOF instrument (Bruker Daltonik GmbH, Germany) equipped with an electrospray ionization (ESI) ion source. The experiments were performed in positive (+) MS ion mode (HV Capillary: +4500 V; HV End Plate Offset: -500 V); with a scan range of  $m/z$  50–1500. External calibration of the mass spectrometer was performed using a low-concentration tuning mix solution (Agilent Technologies). Direct syringe injection was applied for the analyzed reaction solutions in THF (flow rate: 3  $\mu\text{Lmin}^{-1}$ ) for analytical characterization. Nitrogen was applied as nebulizer gas (1 bar) and dry gas (4.0 L/min, 200  $^\circ\text{C}$ ). All data visualization was processed using Data Analysis 5.1 software package from Bruker Daltonics.

High-resolution mass spectra of (**11-7**, **11-8** and **11-9**) was recorded on a Solarix XR FT/ICR mass spectrometer equipped with a 15 T superconducting magnet, a ParaCell analyzer cell and an ESI Apollo II and MALDI SmartBeam-II ion source. External calibration of the mass spectrometer was performed using a low-concentration sodium trifluoroacetate solution (0.1 mg/ml in acetonitrile/water, 1:1). The data set size was 4M



with 64 scans. All MALDI-FT-ICR-MS measurements were recorded in positive ion mode with MTP 384 ground steel target plate (trans-2-[3-(4-tert-Butylphenyl)-2-methyl-2-propenylidene]malononitrile (DCTB) matrix, with a scan range of  $m/z$  150 – 3000). All data visualization was processed using Data Analysis 5.1 software package from Bruker Daltonics.

### Sample preparation for MALDI measurements

20  $\mu$ l of sample (10  $\mu$ g/mL in THF) was mixed with 20  $\mu$ l of DCTB (saturated solution in THF) using a pipette and placed onto a MTP 384 ground steel target plate (Bruker Daltonics, Bremen, Germany) and allow to dry at room temperature.

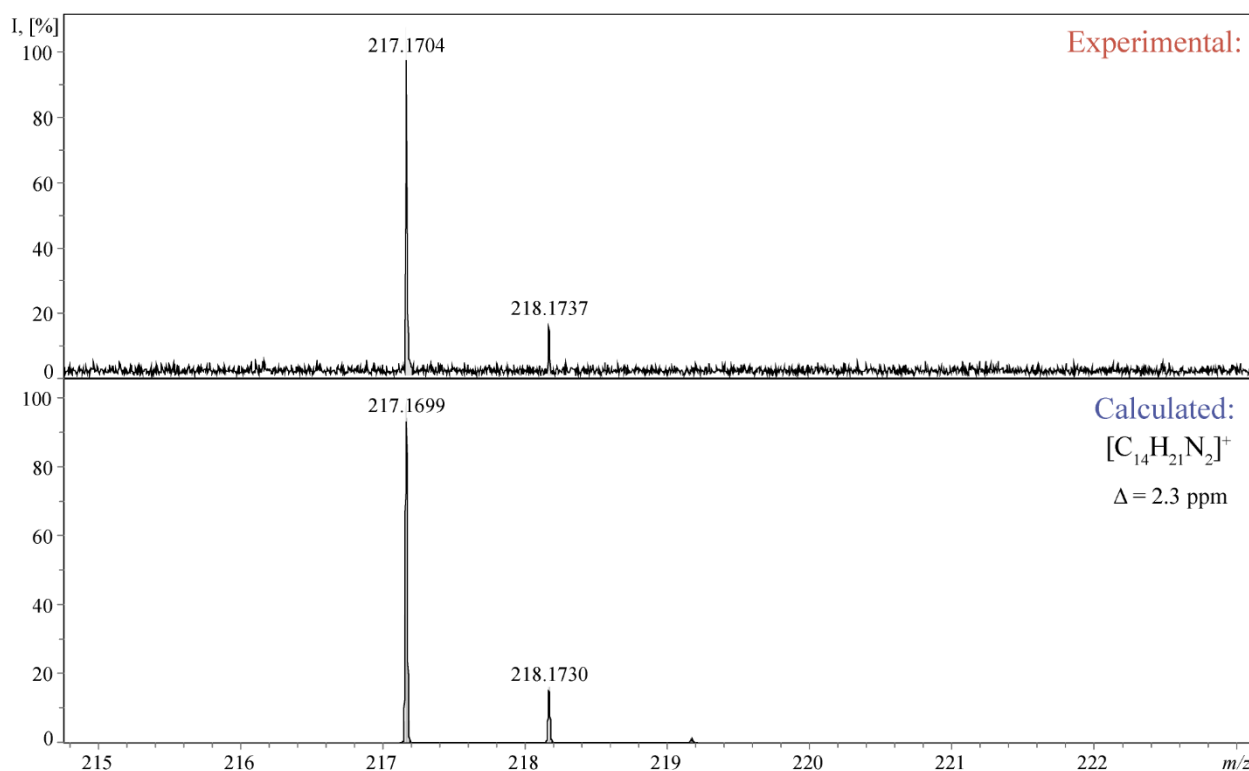

**Figure S23.** Experimentally detected and theoretical ESI-(+)MS spectrum of bispidine **6** from the reaction mixture after 2 hours; main experimental peak  $[M+H]^+ = 217.1704$  Da, calculated for  $C_{14}H_{21}N_2 = 217.1699$  Da,  $\Delta = 2.3$  ppm.

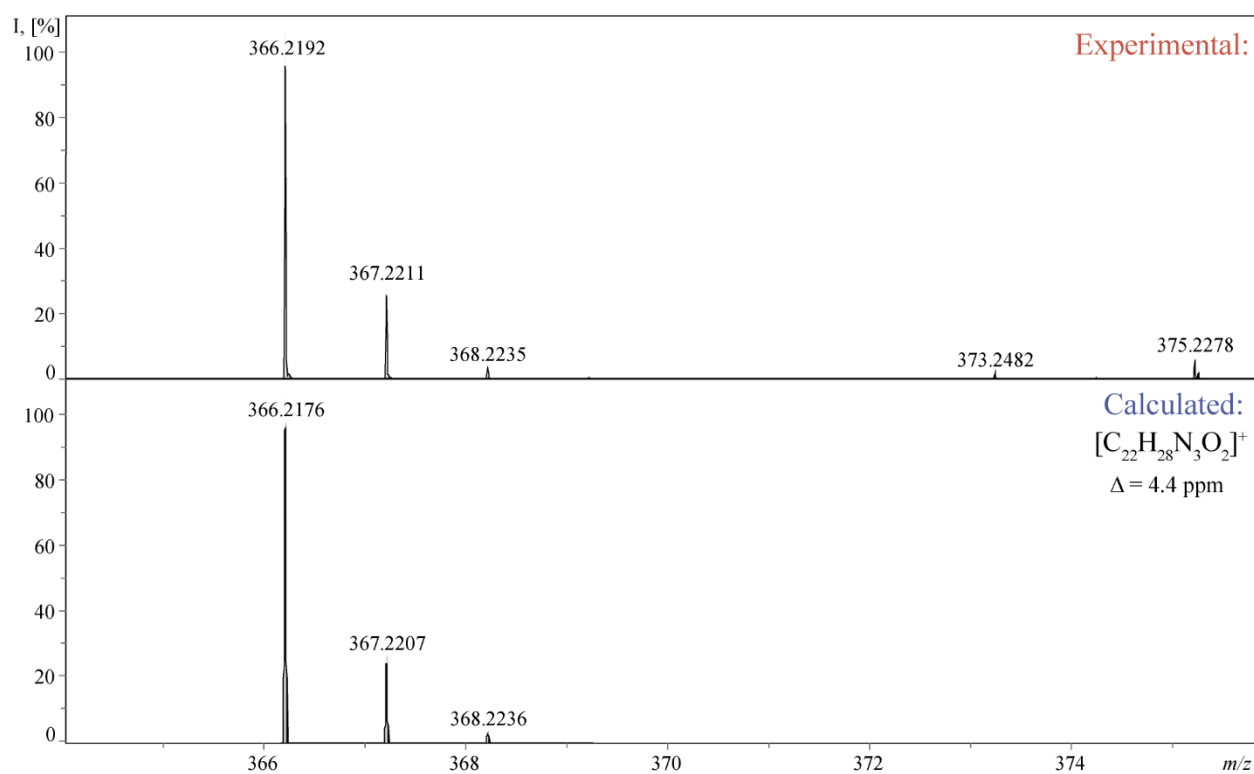

**Figure S24.** Experimentally detected and theoretical ESI-(+)MS spectrum of **11-1** from the reaction mixture after 2 hours; main experimental peak  $[M+H]^+ = 366.2192 \text{ Da}$ , calculated for  $C_{22}H_{28}N_3O_2 = 366.2176 \text{ Da}$ ,  $\Delta = 4.4 \text{ ppm}$ .

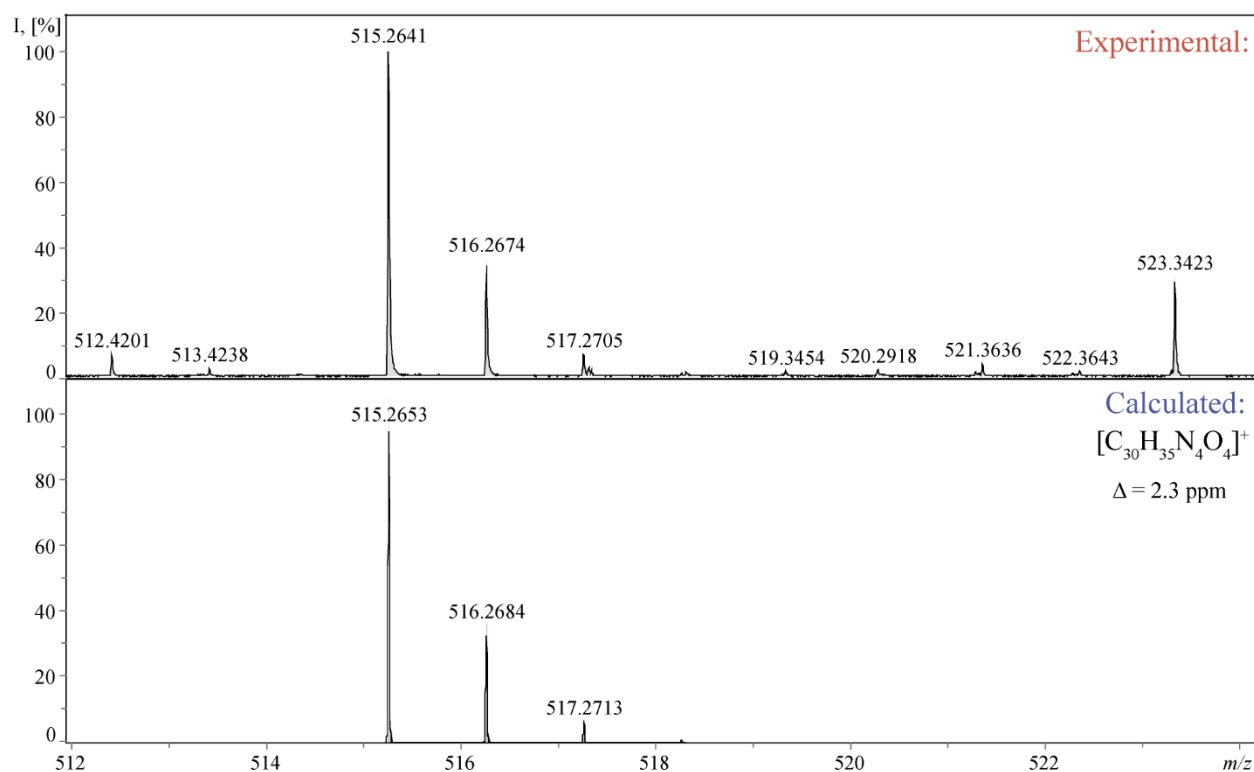

**Figure S25.** Experimentally detected and theoretical ESI-(+)MS spectrum of **11-2** from the reaction mixture after 2 hours; main experimental peak  $[M+H]^+ = 515.2641 \text{ Da}$ , calculated for  $C_{30}H_{35}N_4O_4 = 515.2653 \text{ Da}$ ,  $\Delta = 2.3 \text{ ppm}$ .

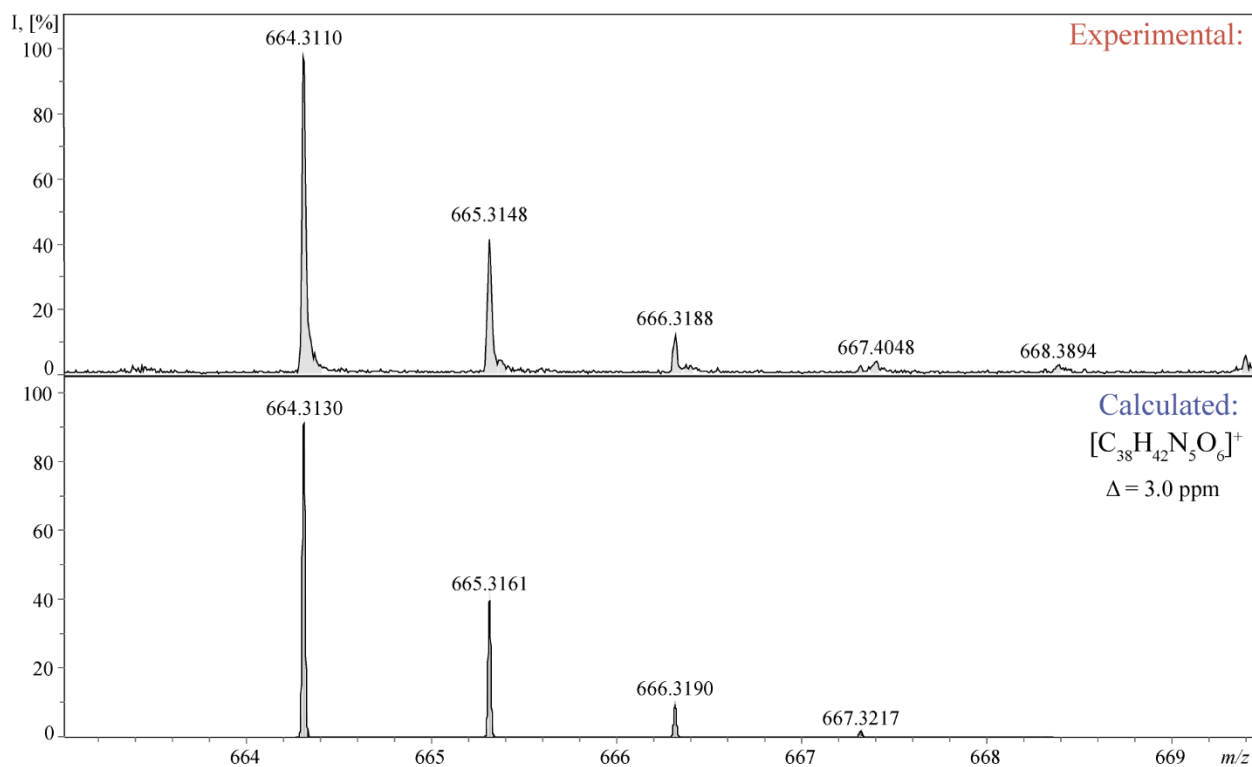

**Figure S26.** Experimentally detected and theoretical ESI-(+)MS spectrum of **11-3** from the reaction mixture after 2 hours; main experimental peak  $[\text{M}+\text{H}]^+ = 664.3110 \text{ Da}$ , calculated for  $\text{C}_{38}\text{H}_{42}\text{N}_5\text{O}_6 = 664.3130 \text{ Da}$ ,  $\Delta = 3.0 \text{ ppm}$ .

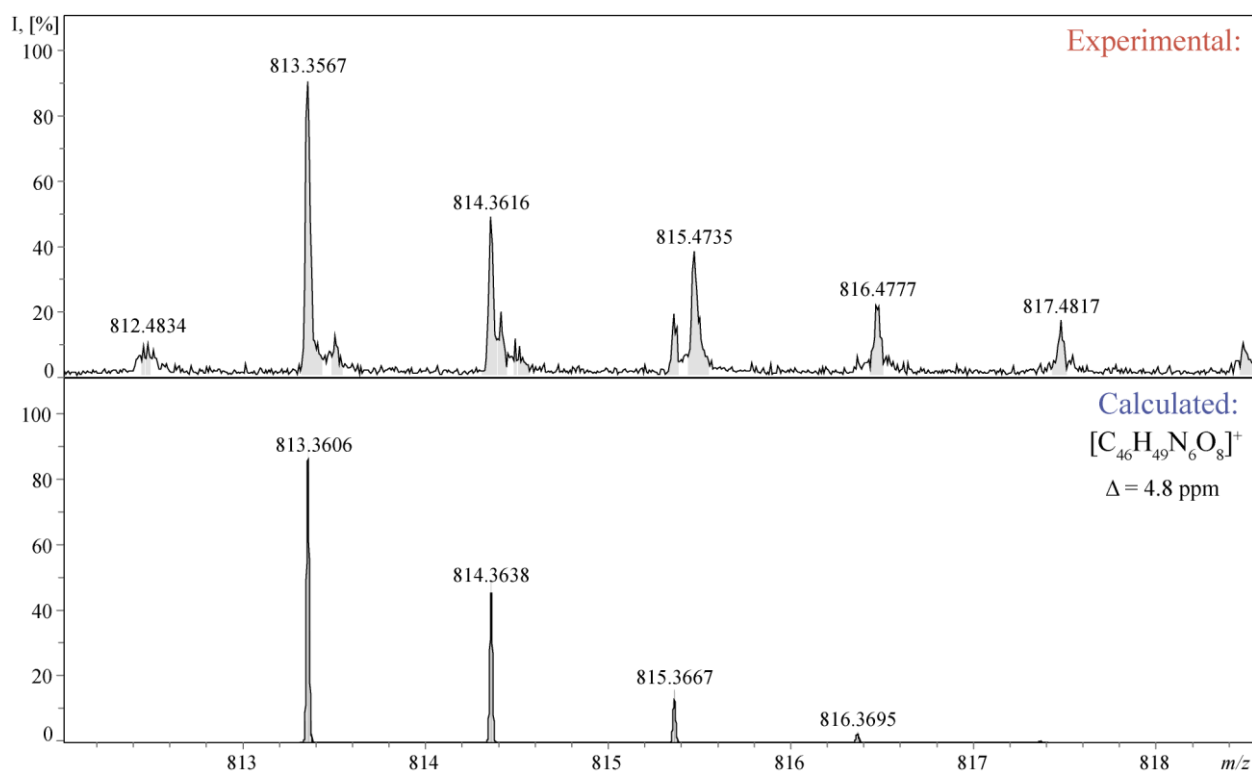

**Figure S27.** Experimentally detected and theoretical ESI-(+)MS spectrum of **11-4** from the reaction mixture after 2 hours; main experimental peak  $[\text{M}+\text{H}]^+ = 813.3567 \text{ Da}$ , calculated for  $\text{C}_{46}\text{H}_{49}\text{N}_6\text{O}_8 = 813.3606 \text{ Da}$ ,  $\Delta = 4.8 \text{ ppm}$ .

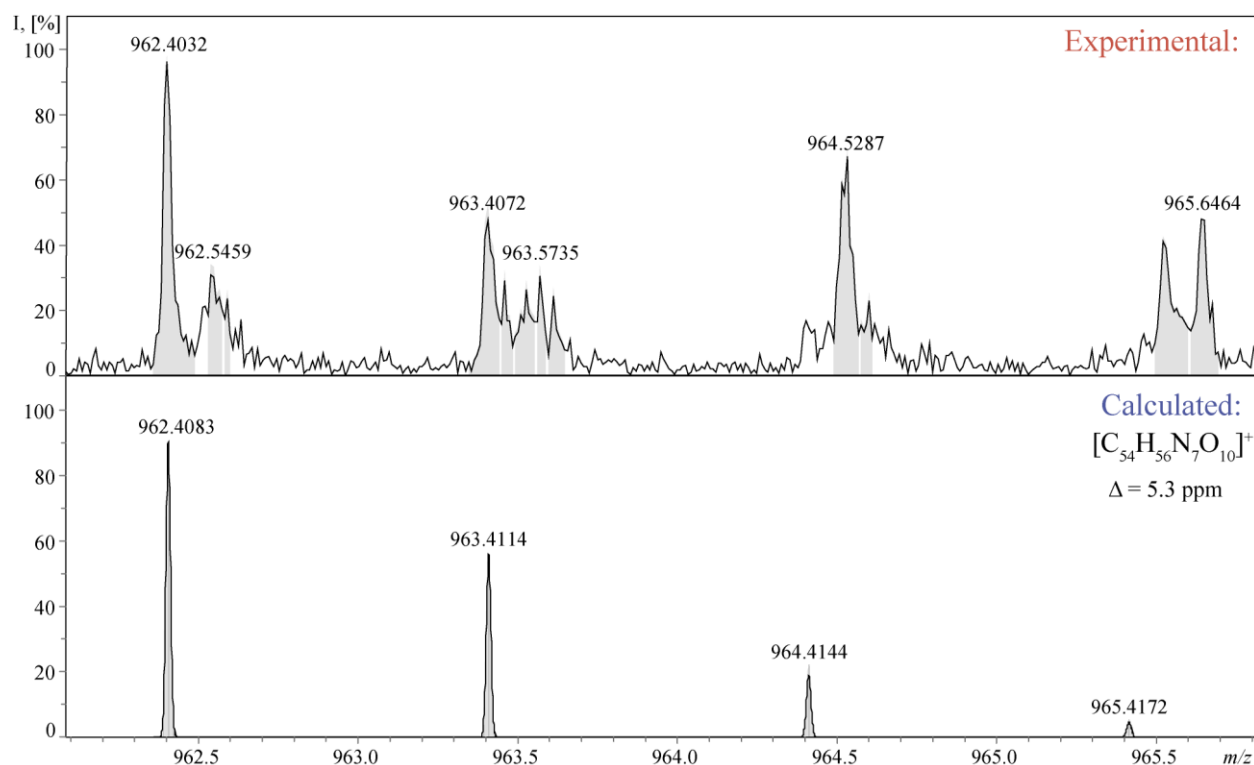

**Figure S28.** Experimentally detected and theoretical ESI-(+)MS spectrum of **11-5** from the reaction mixture after 2 hours; main experimental peak  $[\text{M}+\text{H}]^+ = 962.4032 \text{ Da}$ , calculated for  $\text{C}_{54}\text{H}_{56}\text{N}_7\text{O}_{10} = 962.4083 \text{ Da}$ ,  $\Delta = 5.3 \text{ ppm}$ .

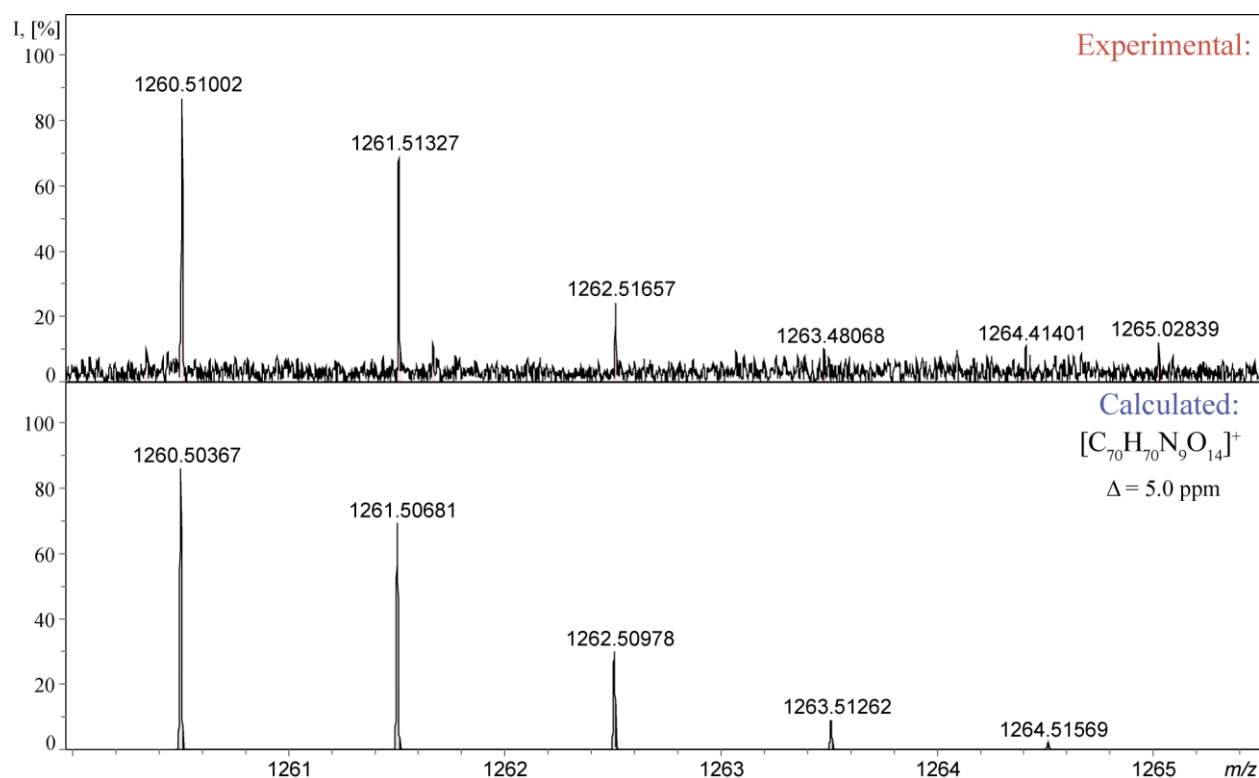

**Figure S29.** Experimentally detected and theoretical MALDI-(+)MS spectrum of **11-7** from the binary reaction mixture (nitrostyrene **3** + bispidine **6**) after 24 hours; main

experimental peak  $[M+H]^+ = 1260.51002$  Da, calculated for  $C_{70}H_{70}N_9O_{14} = 1260.50367$  Da,  $\Delta = 5.0$  ppm.

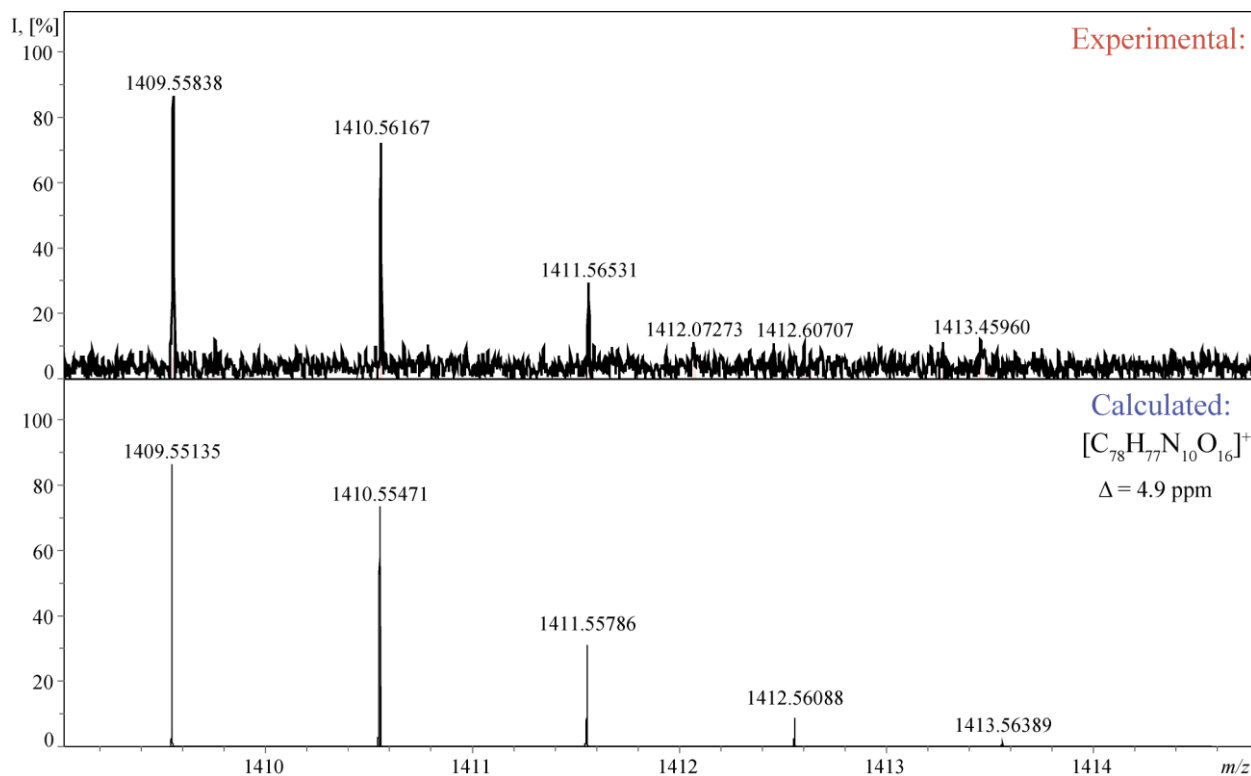

**Figure S30.** Experimentally detected and theoretical MALDI-(+)MS spectrum of **11-8** from the binary reaction mixture (nitrostyrene **3** + bispidine **6**) after 24 hours; main experimental peak  $[M+H]^+ = 1409.55838$  Da, calculated for  $C_{78}H_{77}N_{10}O_{16} = 1409.55135$  Da,  $\Delta = 4.9$  ppm.

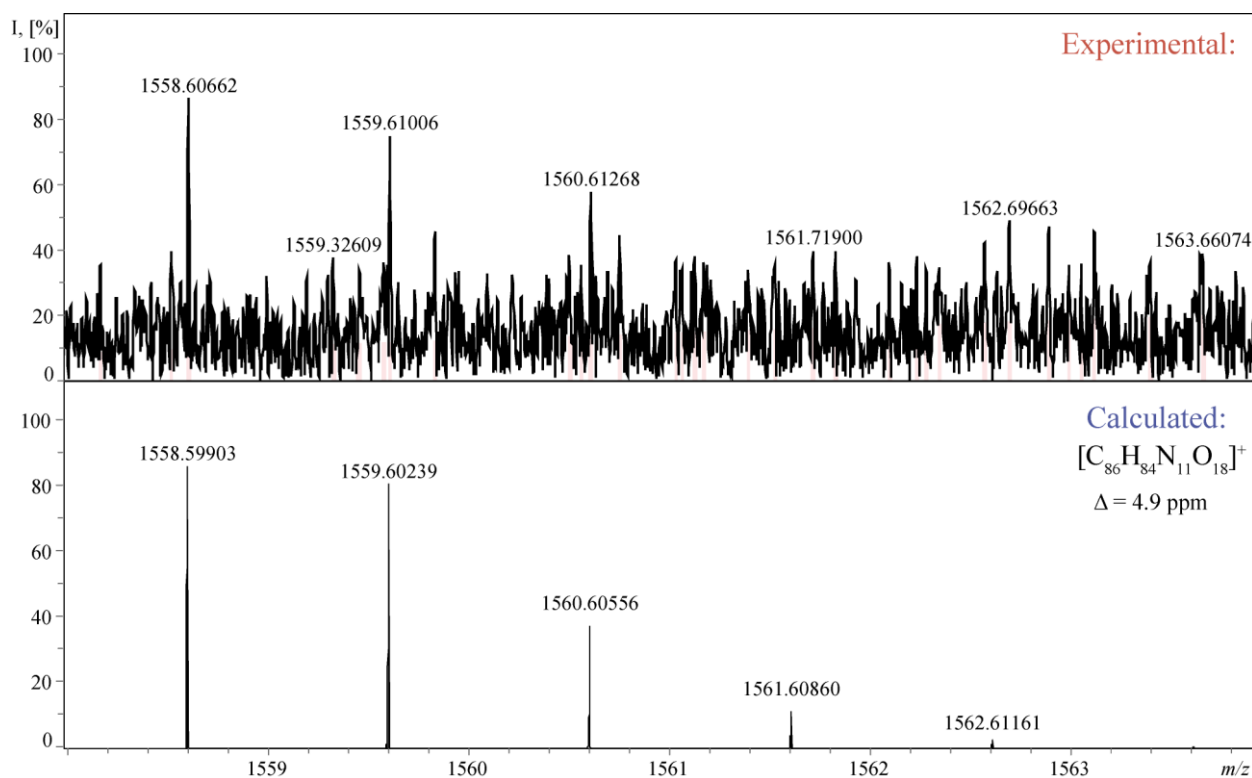

**Figure S31.** Experimentally detected and theoretical MALDI-(+)MS spectrum of **11-9** from the binary reaction mixture (nitrostyrene **3** + bispidine **6**) after 24 hours; main experimental peak  $[M+H]^+ = 1558.60662$  Da, calculated for  $C_{86}H_{84}N_{11}O_{18} = 1558.59903$  Da,  $\Delta = 4.9$  ppm.

## IR spectra

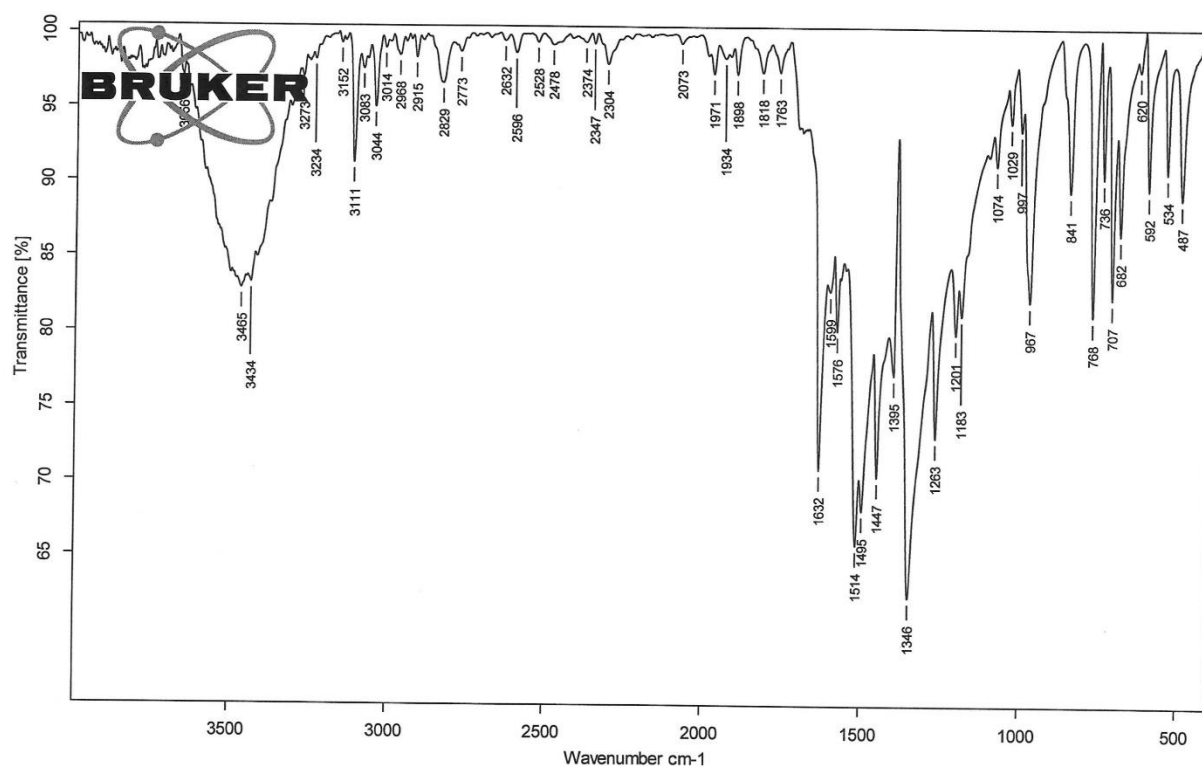

**Figure S32.** IR spectrum (KBr) of nitrostyrene **3**.

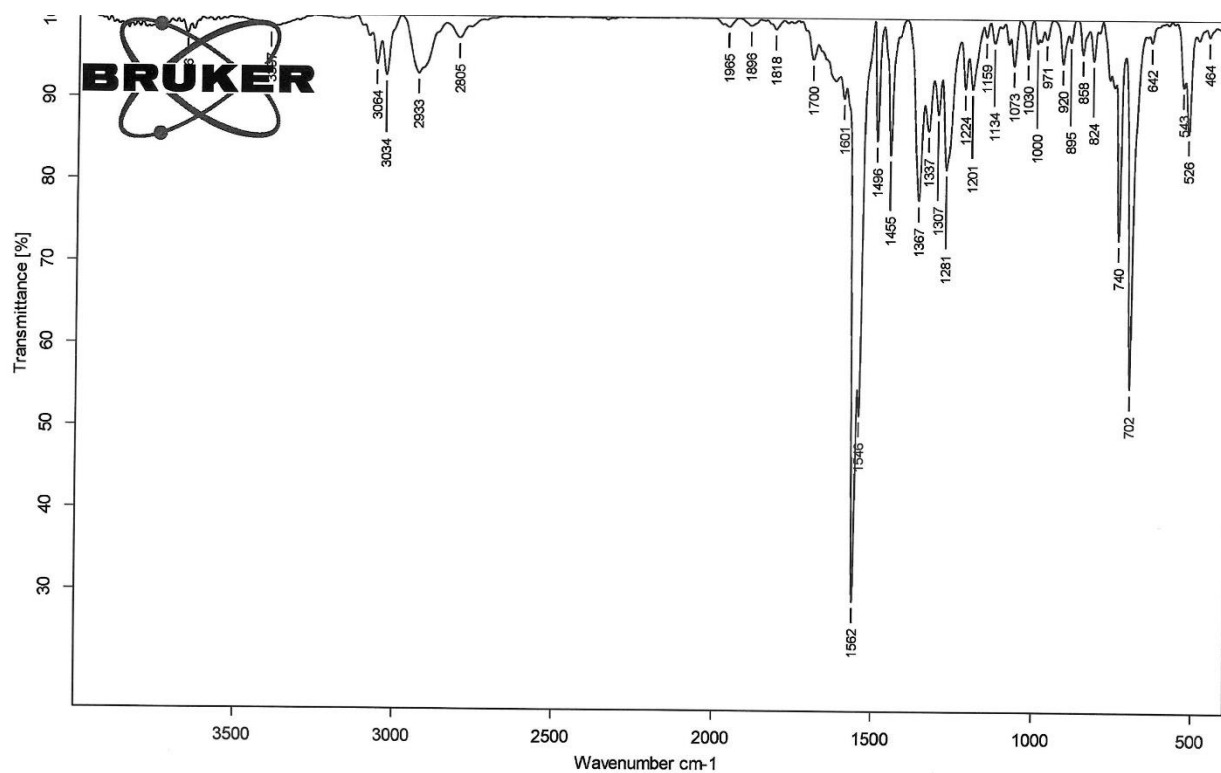

**Figure S33.** IR spectrum (KBr) of precipitate from binary reaction between nitrostyrene **3** and bispidine **6** in toluene.

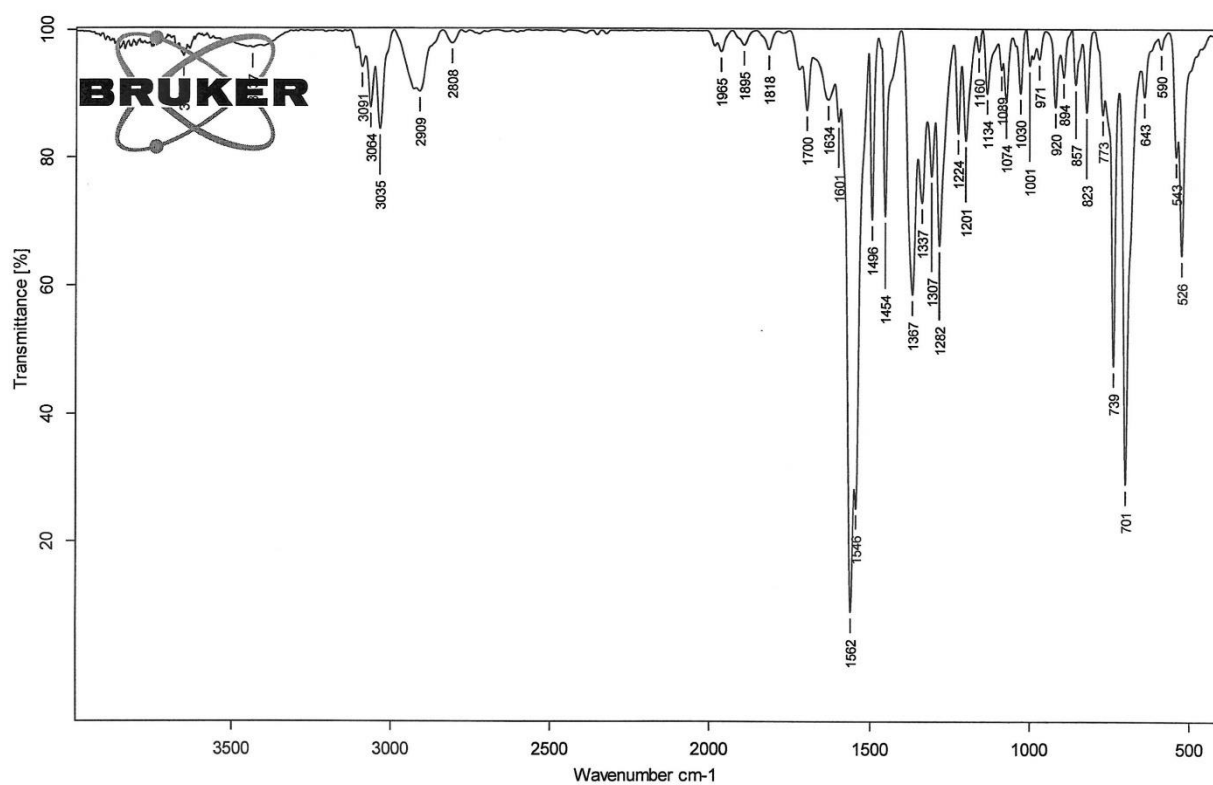

**Figure S34.** IR spectrum (KBr) of precipitate from binary reaction between nitrostyrene **3** and bispidine **6** in  $\text{CHCl}_3$ .

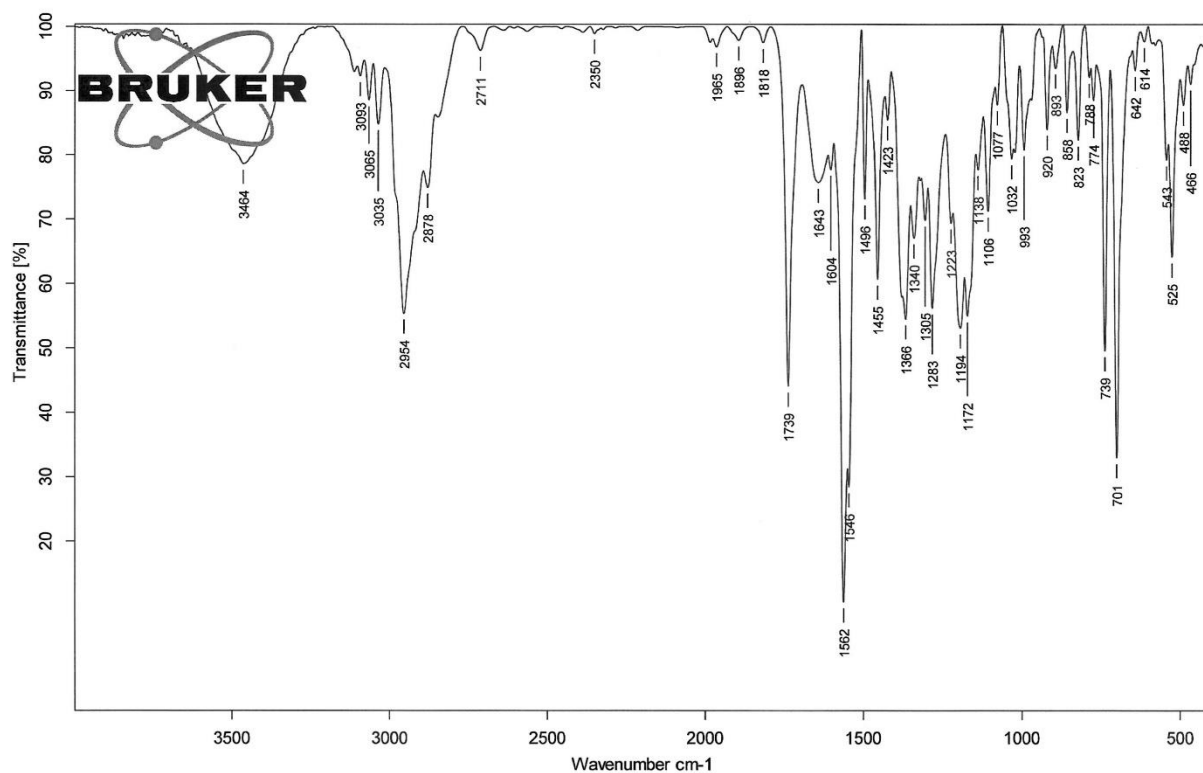

**Figure S35.** IR spectrum (KBr) of precipitate from binary reaction between nitrostyrene **3** and bispidine **10a** in toluene.

### TGA/DSC-analysis

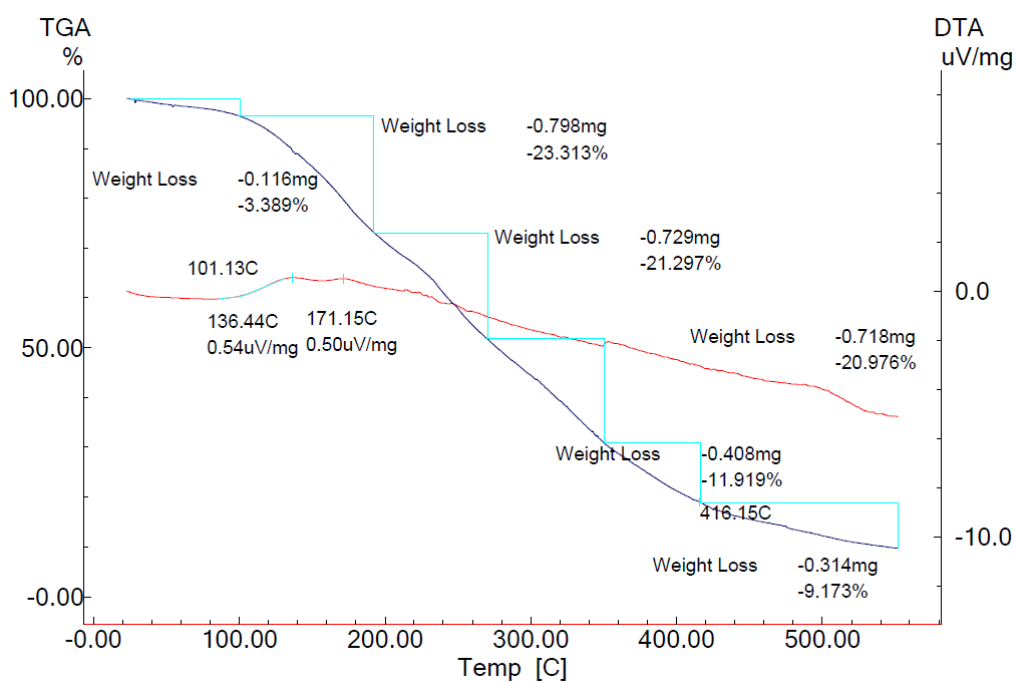



**Figure S36.** TGA-DSC analysis of the precipitate from the reaction between nitrostyrene **3** and bispidine **6** in toluene.

### SEM-EDX study

#### Methodology of scanning electron microscopy and energy dispersive X-ray spectroscopy of precipitate

Target-oriented approach was utilized for the optimization of the analytic measurements [1]. Before measurements the samples were mounted on a 25 mm aluminum specimen stub and fixed by graphite adhesive tape. Metal coating with a thin film (10 nm) of chromium was performed using magnetron sputtering method as described earlier [2]. The observations were carried out using Hitachi SU8000 field-emission scanning electron microscope (FE-SEM). Images were acquired in secondary electron mode at 30 kV accelerating voltage and at working distance 8-10 mm. Morphology of the samples was studied taking into account possible influence of metal coating on the surface [2]. EDX studies were carried out using Oxford Instruments X-max EDX system before metal coating.

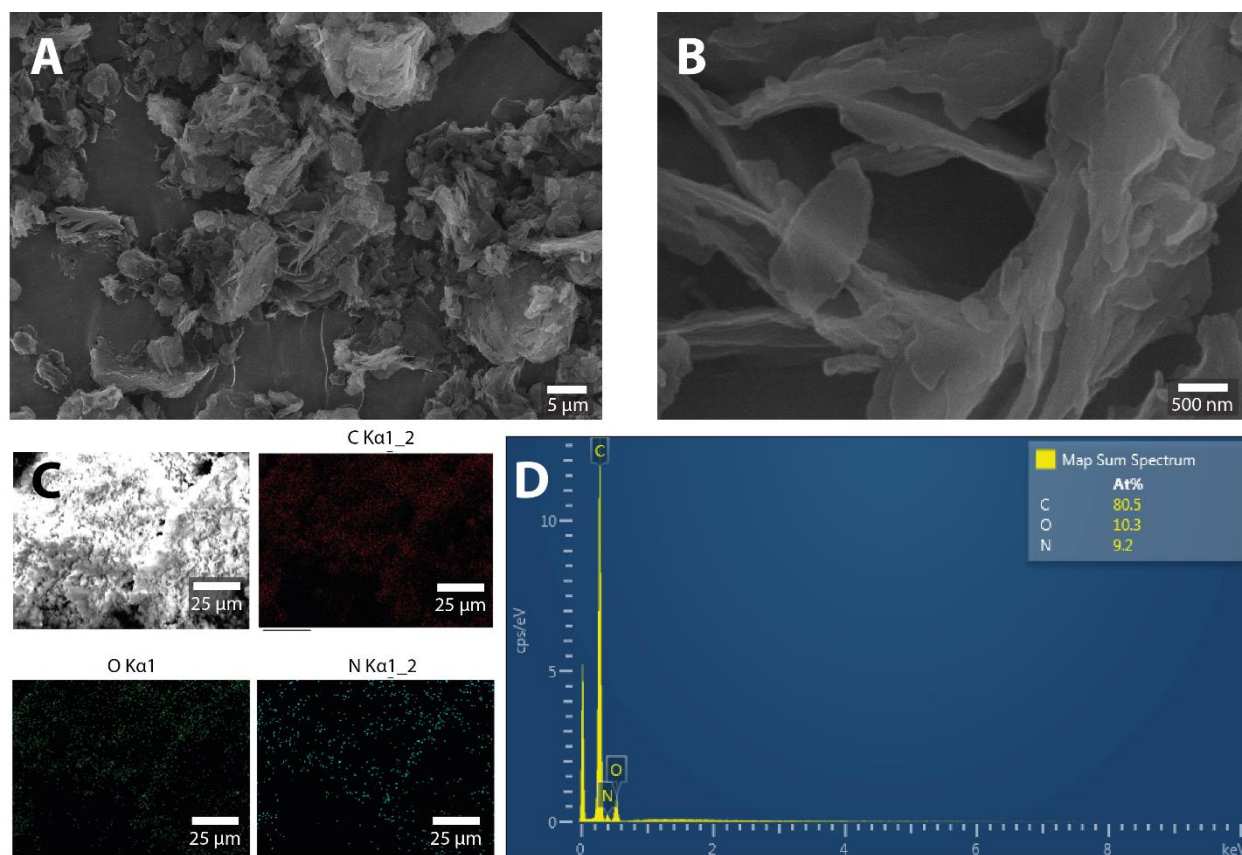

**Figure S37.** Results of SEM-EDX study of precipitate from binary reaction mixture between nitrostyrene **3** and bispidine **6** in toluene. A, B – scanning electron microscopy images with 5 000x and 50 000x magnifications; C - element distribution maps obtained by energy dispersive spectroscopy; D - EDX spectrum of precipitate.

The particle size ranged from 1 to 10  $\mu\text{m}$ . The particles had an irregular shape and layered morphology; the thickness of individual layers could vary from 100 to 500 nm. EDX data showed a uniform distribution of carbon, nitrogen and oxygen in the sample without impurities of other elements within the sensitivity of the method. The C : O : N ratio was 8 : 1 : 1.

### The addition of diethyl malonate to $\beta$ -nitrostyrene in the presence of catalytic amounts of NaH

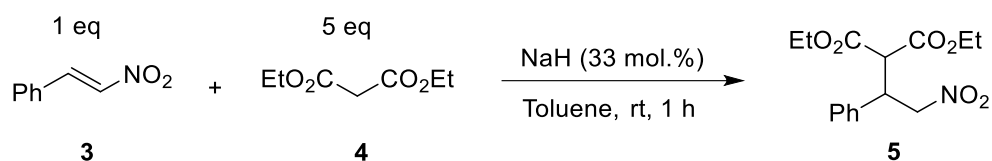

To a solution of 50 mg (0.34 mmol) of  $\beta$ -nitrostyrene (**3**) in 3 mL of dry toluene was added 2.7 mg (0.11 mmol, 33 mol. %) of NaH and 255  $\mu\text{L}$  (268 mg, 1.7 mmol) of diethyl malonate (**4**); the mixture was stirred for 1 h at room temperature. TLC analysis showed complete conversion of nitrostyrene **3**. The reaction mixture was then diluted with water, the organic phase was separated, dried over anhydrous  $\text{Na}_2\text{SO}_4$  and evaporated in vacuo. The residue obtained without further purification was analyzed by  $^1\text{H}$  NMR spectroscopy in  $\text{CDCl}_3$ .

The complete conversion of  $\beta$ -nitrostyrene (**3**) with the formation of the addition product (**5**) was confirmed by analysis of the  $^1\text{H}$  NMR spectrum (fig. S38).

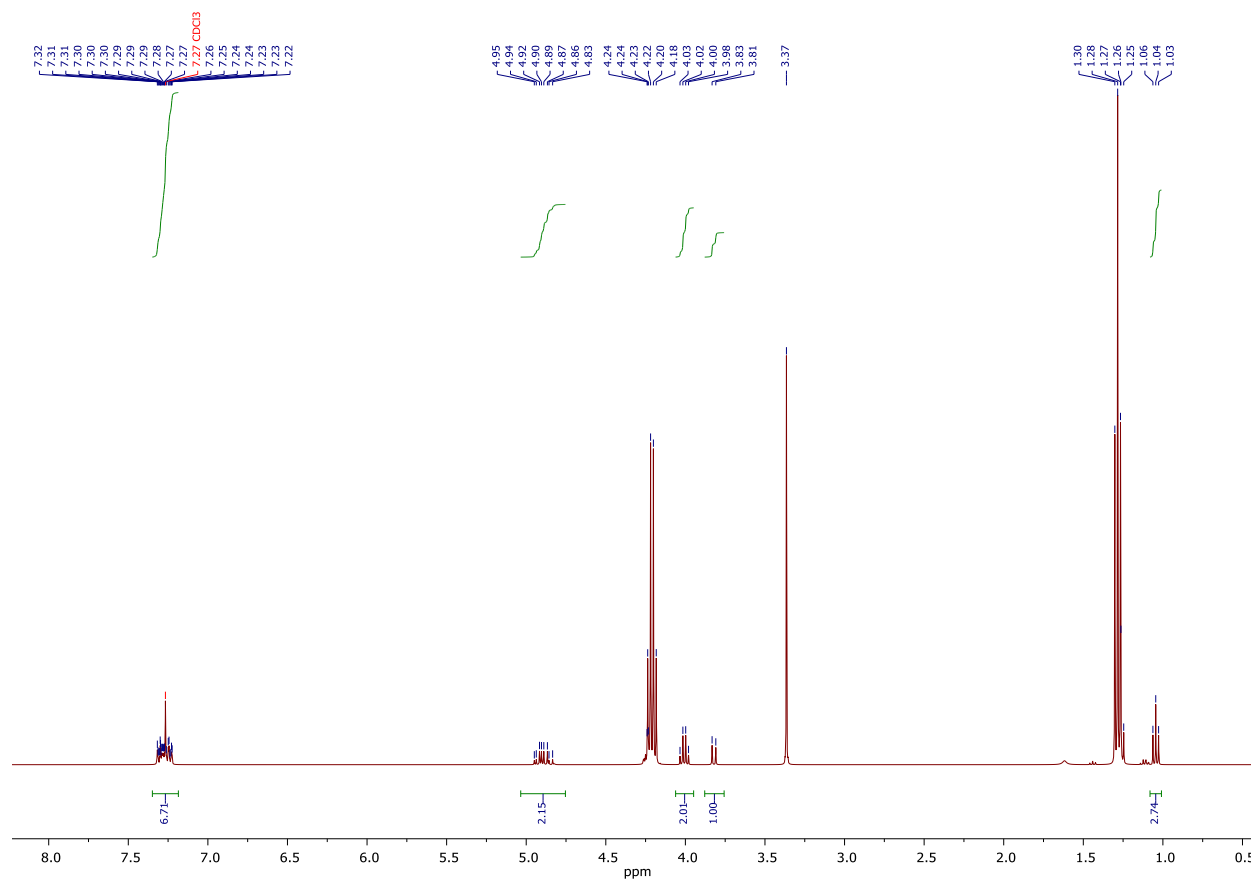

**Figure S38.**  $^1\text{H}$  NMR (400 MHz,  $\text{CDCl}_3$ ) spectrum of the addition reaction of diethyl malonate **4** with nitrostyrene **3** in the presence of NaH. The signals corresponding to the reaction product **5** are marked in the figure.

## References

1. Kachala, V. V; Khemchyan, L.L.; Kashin, A.S.; Orlov, N. V; Grachev, A.A.; Zalesskiy, S.S.; Ananikov, V.P. Target-oriented analysis of gaseous, liquid and solid chemical systems by mass spectrometry, nuclear magnetic resonance spectroscopy and electron microscopy. *Russ. Chem. Rev.* **2013**, 82, 648–685.
2. Kashin, A.S.; Ananikov, V.P. A SEM study of nanosized metal films and metal nanoparticles obtained by magnetron sputtering. *Russ. Chem. Bull.* **2011**, 60, 2602–2607.
